# Supplementary material for: Empagliflozin in Patients with Chronic Kidney Disease
Source: PubMed Central journal article supplement (PMC7614055; doi:10.1056/nejmoa2204233), 2022-11-04
Supplement: EMS156034-supplement-Supplementary_materials.pdf [file EMS156034-supplement-Supplementary_materials.pdf]

# Empagliflozin in Patients with Chronic Kidney Disease

## The EMPA-KIDNEY Collaborative Group

### Supplementary Appendix

#### TABLE OF CONTENTS

|                                                                                                                            |    |
|----------------------------------------------------------------------------------------------------------------------------|----|
| Members of the EMPA-KIDNEY Collaborative Group.....                                                                        | 2  |
| Membership of the Executive Committee, Steering Committee and Independent Data Monitoring Committee<br>.....               | 2  |
| List of Collaborators, by Site .....                                                                                       | 3  |
| Supplementary Methods.....                                                                                                 | 12 |
| Approach to Recording of Outcomes, Adjudication and Outcome Definitions .....                                              | 12 |
| Trial Adaptations due to Coronavirus-2019 Disease (COVID-19) .....                                                         | 32 |
| Laboratory Methods .....                                                                                                   | 32 |
| Supplementary Statistical Methods.....                                                                                     | 33 |
| Supplementary Figures.....                                                                                                 | 35 |
| Figure S1. CONSORT Flow Diagram .....                                                                                      | 36 |
| Figure S2a. Kidney Disease Progression.....                                                                                | 37 |
| Figure S2b. Death from Cardiovascular Causes.....                                                                          | 38 |
| Figure S3. Death by Cause .....                                                                                            | 39 |
| Figure S4. Primary Outcome by Key and Other Prespecified Subgroups .....                                                   | 40 |
| Figure S5. Kidney Disease Progression by Key Prespecified Subgroups (Prespecified Exploratory Outcome) .....               | 42 |
| Figure S6. Comparison of Estimated Chronic Slope with Mean Observed Estimated Glomerular Filtration<br>Rate.....           | 43 |
| Figure S7. Annual Rate of Change in Estimated GFR by Key Prespecified Subgroups (Prespecified Exploratory<br>Outcome)..... | 44 |
| Supplementary Tables .....                                                                                                 | 45 |
| Table S1. Representativeness of Study Participants.....                                                                    | 46 |
| Table S2. Other Characteristics of Participants at Randomization .....                                                     | 47 |
| Table S3. Reasons for Discontinuing Randomized Treatment .....                                                             | 49 |
| Table S4. All Hospitalizations Grouped By MedDRA System Organ Class .....                                                  | 51 |
| Table S5. Other Secondary and Tertiary Outcomes.....                                                                       | 52 |
| Table S6. New-Onset Diabetes .....                                                                                         | 53 |
| Table S7. Additional Safety Outcomes .....                                                                                 | 54 |
| Table S8. All Serious Adverse Events Grouped By MedDRA System Organ Class.....                                             | 55 |
| Table S9a. Physical and Laboratory Assessments .....                                                                       | 56 |
| Table S9b. Liver Function Test Assessments, by Time .....                                                                  | 57 |
| Table S10. Local Laboratory Blood Assessments at 18 Months, in a Subset from the United Kingdom .....                      | 58 |

## Members of the EMPA-KIDNEY Collaborative Group

Membership of the Executive Committee, Steering Committee and Independent Data Monitoring Committee

### **Executive Committee**

Colin Baigent (co-Chair), Martin J. Landray (co-Chair), Christoph Wanner (Deputy Chair), William G. Herrington (Chief Investigator), Richard Haynes (co-Principal Investigator), Jennifer B. Green, Sibylle J. Hauske\*, Martina Brueckmann\*, Mark Hopley\*  
(Previous members: Maximillian von-Eynatten\* & Jyothis George\*)

### **Steering Committee**

Executive Committee members plus National Representatives: Susanne Brenner (Germany); Alfred K. Cheung (United States); David Preiss (United Kingdom); Zhi-Hong Liu, Jing Li (China); Laiseong Hooi, Wen Liu (Malaysia); Takashi Kadowaki, Masaomi Nangaku (Japan); Adeera Levin, David Cherney (Canada); Roberto Pontremoli, Aldo P. Maggioni (Italy); plus statistician members: Natalie Staplin, Jonathan Emberson, Stefan Hantel\*; plus other expert members: Shinya Goto, Rajat Deo, Katherine R. Tuttle. Non-voting members: Michael Hill, Parminder Judge, Kaitlin J. Mayne, Sarah Y.A. Ng, Xavier Rossello, Emily Sammons, Doreen Zhu

\* denotes a Boehringer Ingelheim employee

### **Independent Data Monitoring Committee**

Peter Sandercock (Chair), Rudolf Bilous, Charles Herzog, Paul Whelton, Janet Wittes, Derrick Bennett (non-voting statistician)

List of Collaborators, by Site

**Central Coordinating Office (Clinical Trial Service Unit and Epidemiological Studies Unit [CTSU], University of Oxford)**

*Administration:* Patricia Achiri, Chrissie Ambrose, Cristina Badin, Jill Barton, Richard Brown, Andy Burke, Sebastian Butler, Rejive Dayanandan, Pia Donaldson, Robert Dykas, Lucy Fletcher, Kate Frederick, Hannah Kingston, Mo Gray, Emily Harding, Akiko Hashimoto, Lyn Howie, Susan Hurley, Ryonfa Lee, Nik Luker, Kevin Murphy, Mariko Nakahara, John Nolan, Michelle Nunn, Sorcha Mulligan, Akiko Omata, Sandra Pickworth, YanRu Qiao, Shraddha Shah, Karen Taylor, Alison Timadger, Monique Willett, Liz Wincott, Qin Yan, Hui Yu; *Clinical:* Louise Bowman, Fang Chen, Robert Clarke, Michelle Goonasekera, Richard Haynes, William G. Herrington, Parminder Judge, Waseem Karsan, Marion Mafham, Kaitlin J. Mayne, Sarah Y. A. Ng, David Preiss, Christina Reith, Emily Sammons, Mohammed Zayed, Doreen Zhu; *Data Analysis:* Ritva Ellison, Rowan Moys, Will Stevens, Kevin Verdel, Karl Wallendszus; *Finance:* Chris Bowler, Anna Brewer, Andy Measor; *IT Validation:* Guanguo Cui, Charles Daniels, Angela Field, Bob Goodenough, Ashley Lawson, Youcef Mostefai, Dheeptha Radhakrishnan, Samee Syed, Shuang Xia; *Laboratory:* Ruth Adewuyi-Dalton, Thomas Arnold, Anne-Marie Beneat, Anoushka Bhatt, Chloe Bird, Andrew Breach, Laura Brown, Mark Caple, Tatyana Chavagnon, Karen Chung, Sarah Clark, Luminita Condurache, Katarzyna Eichstadt, Marta Espino Obrero, Scarlett Forest, Helen French, Nick Goodwin, Andrew Gordon, Joanne Gordon, Cat Guest, Tina Harding, Michael Hill, Michal Hozak, Matthew Lacey, David MacLean, Louise Messinger, Stewart Moffat, Martin Radley, Claire Shenton, Sarah Tipper, Jon Tyler, Lesley Weaving, James Wheeler, Elissa Williams, Tim Williams, Hamish Woodhouse; *Monitoring:* Angela Chamberlain, Jo Chambers, Joanne Davies, Denise Donaldson, Pati Faria-Shayler, Denise Fleming-Brown, Jennifer Ingell, Carol Knott, Anna Liew, Helen Lochhead, Juliette Meek, Isabel Rodriguez-Bachiller, Andrea Wilson, Patrick Zettergren; *Programming:* Rach AitSadi, Ian Barton, Alex Baxter, Yonghong Bu, Lukasz Danel, Sonja Grotjahn, Rijo Kurien, Michael Lay, Archie Maskill, Aleksandra Murawska, Rachel Raff, Allen Young; *Principal Investigators:* Colin Baigent, Richard Haynes, William G. Herrington, Martin J. Landray, David Preiss; *Statistics:* Jonathan Emberson, Rebecca Sardell, Natalie Staplin

**Regional Coordinating Centres**

**Germany (Universitätsklinikum Würzburg):** Christoph Wanner, Susanne Brenner, Vladimir Cejka, Marcela Fajardo-Moser, Christian Hartner, Doris Poehler, Janina Renner, Franziska Scheidemantel

**United States (Duke Clinical Research Institute [DCRI]):** Jennifer B. Green, Miya Bryant, Anita Hepditch, Cassandra Johnson, Erin Latore, Yolanda Miller, Lauren Price, Merilee Whalen, Ashleigh Wheeler

**United Kingdom (Clinical Trial Service Unit and Epidemiological Studies Unit [CTSU], University of Oxford):** Richard Haynes, David Preiss, William G. Herrington, Parminder Judge, Doreen Zhu, Sarah Y. A. Ng, Kaitlin J. Mayne, Cristina Badin, Jo Chambers, Joanne Davies, Denise Donaldson, Mo Gray, Emily Harding, Jenny Ingell, Yanru Qiao, Shraddha Shah, Andrea Wilson, Patrick Zettergren

**China (National Center for Cardiovascular Disease, Fuwai Hospital & National Clinical Research Center of Kidney Diseases, Jinling Hospital, Nanjing University School of Medicine):** Zhi-Hong Liu, Jing Li, Yu An, Yinghua Chen, Peiling Chen, Hao Dai, Hong Du,

Fang Feng, Qing Guo, Libo Hou, Wuhanbilige Hundei, Binbin Jin, Yan Li, Jiamin Liu, Xia Song, Yanping Wang, Yanwu Yu, Ning Zhang, Lingshan Zhao, Hui Zhong

**Malaysia (Klinsel SDN BHD):** Cheng Beng Goh, Ye Mun Low, Soon Yi Sor, Farah Hanis Zulkipli, Sarojini Sivanandam

**Japan (Parexel):** Natsuki Arai, Ai Fukasawa, Mizue Furukawa, Keisuke Habuki, Shoko Hayashi, Wakako Isari, Saki Kanegae, Maria Kawai, Reiki Kobayashi, Takako Kuramae, Chika Kuribayashi, Sawako Maeno, Satoshi Masumoto, Tomoko Morisaki, Minoru Oda, Kazue Sawada, Kenta Sugamori, Ayana Tatsuzawa, Aiko Tomita, Kazuyuki Yuasa, Hiroko Inazawa

**Canada (University of British Columbia):** Adeera Levin, Amanda Axler, Kerri Gallo

**Italy (ANMCO Research Center):** Aldo P. Maggioni, Ester Baldini, Barbara Bartolomei Mecatti, Francesca Bianchini, Martina Ceseri, Laura Cipressa, Gianna Fabbri, Andrea Lorimer, Donata Lucci

### Local Clinical Centres

**Germany:** *Universitätsklinikum Würzburg:* Christoph Wanner, Susanne Brenner, Vladimir Cejka, Sharang Ghavampour, Anja Knoppe; *Zentrum fuer Nieren-, Hochdruck- und Stoffwechselerkrankungen Hannover:* Hans Schmidt-Gurtler, Hubert Dumann, Sybille Merscher, Margret Patecki, Georg Rainer Schlieper, Anke Torp, Bianca Weber, Maja Zietz; *Nephrologisches Zentrum Villingen-Schwenningen:* Bernd Hohenstein, Urs Benck, Diliana Draganova, Thomas Weinreich, Lothar Wolf, Jasmine Gaidu, Hanna Reiner, Mandy Visnjic; *Nierenzentrum Freiburg:* Daniel Steffl, Marie Breitenfeldt, Annette Kraemer-Guth, Christine Braun, Simone Hagge; *Dialysezentrum Heilbronn:* Michael Schomig, Stephan Matthias, Dominik Stoffler, Beate Schumacher; *Klinikum der Universität München:* Thomas Sitter, Louise Fuessl, Julia Krappe, Jerome Loutan, Volker Vielhauer, Luciano Andriaccio, Magdalena Maurer; *ClinPhenomix GmbH Co. KG:* Bernhard Winkelmann, Martin Dursch, Linda Seifert, Linda Tenbusch; *Universitätsmedizin Mainz:* Julia Weinmann-Menke, Simone Boedecker, Wiebke Kaluza-Schilling, Daniel Kraus, Carina Krieger, Margit Schmude, Anne Schreiber, Ewelina Eckrich; *Herz- und Diabeteszentrum Nordrhein-Westfalen:* Diethelm Tschope, Abdulwahab Arbi, Young Lee-Barkey, Bernd Stratmann, Natalie Prib, Sina Rolfsmeier, Irina Schneider; *Universitätsklinikum Düsseldorf:* Lars Rump, Johannes Stegbauer, Christine Pötz, Mara Schemmelmann, Claudia Schmidt; *Nephrocare Mettmann - Standort Velbert:* Michael Koch, Sendogan Aker, Annika Küpper, Manuela Martin; *Diaverum MVZ Potsdam:* Thiemo Pfab, Christian Albert, Michael Haase, Barbara Zander, Claudia Schneider-Danwitz; *Praxis für Dialyse und Nierenkrankheiten - Arztezentrum Helle Mitte:* Wolfgang Seeger, Wolf-Adam Seeger, Britta Zemann; *Klinikum Bielefeld:* Christoph Stellbrink, Kristin Marx, Ekaterina Stellbrink, Britta Brettschneider, Stephanie Watson, Marion Iselt; *Studienzentrum Aschaffenburg:* Gerhard Klausmann, Inga-Nadine Kummer, Auguste Kutschat, Simone Streitenberger; *Universitätsklinikum Halle:* Matthias Girndt, Silke Markau, Ina Girakosyan, Claudia Hanf; *Klinikum St. Georg Leipzig:* Joachim Beige, Ralph Wendt, Ulrike Schmidt; *Studienzentrum Nephrologie Nürnberg-Langwasser:* Andreas Schneider, Roland Veelken, Claudia Donhauser, Auguste Kutschat; *UBAG für Nephrologie und Dialyse Neckarsulm:* Luis Becker, Nexhat Miftari, Ricarda Wolfling, Sarah Morlok; *Universitätsklinikum Dresden:* Christian Hugo, Alexander Paliege, Jens Passauer, Julian Stumpf, Annegret Fleischer, Kerstin Haaser; *Universitätsklinikum Mannheim:* Bernhard Kraemer, Jan Jochims, Bernd Kruger, Claudia Foellinger, Anastassiya Reisler; *Nierenzentrum Wiesbaden:* Frank Strutz, Stefan Haack, Ursula Hohenstatt; *Universitätsklinikum Jena:* Martin Busch, Konstantin Herfurth, Gunter Wolf, Rainer Paul; *Studienzentrum für Nieren- und Hochdruckerkrankungen Hannover:* Hermann Haller, Jessica Kaufeld, Jan Menne, Elisabeth Bahlmann-Kroll, Angela Bergner; *Universitätsklinikum Augsburg:* Horst Weihprecht, Aydin Er,

Florian Sonntag, Elif Turan, Michael Wittmann, Franziska Klauser, Eva Voigt; *Nephrologisches Zentrum Göttingen*: Volker Schettler, Egbert Schulz, Madlen Rohnstock, Elke Schettler; *Universitätsklinik Ulm*: Bernd Schroppel, Rene van Erp, Martin Kachele, Ulla Ludwig, Lena Schulte-Kemna, Waltraud Kmietschak, Elke Preiss, Martina Ruocco; *AGAPLESION Markus-Krankenhaus*: Gunnar Heine, Martin Brzoska, Sebastian Gabel, Christina Büttner, Asma Sabarai; *Universitätsklinikum Regensburg*: Bernhard Banas, Tobias Bergler, Yvonne Ehrl, Franz Putz, Antonia Schuster, Stefanie Kuhn, Torsten Schramm; *DaVita Viersen - Nettetal*: Stefan Degenhardt, Gerhard Schmidt, Lea Weiland, Ulrike Giebel-Hudnell; *Klinikum Braunschweig*: Jan Kielstein, Gabriele Eden, Brigitte Fuchs, Gina Morig, Manuela Winkler; *Nephrocare Mettmann*: Michael Koch, Sendogan Aker, Annika Küpper, Manuela Martin; *Vivantes Klinikum Neukölln*: Harald Darius, Charalampos Kriatselis, Carl-Philipp Roesch; Astrid Maselli, *Robert-Bosch-Krankenhaus Stuttgart*: Dominik Alscher, Markus Ketteler, Moritz Schanz, Severin Schrickler, Bianka Rettenmaier, Andrea Schwab

**United States:** *Clinical Advancement Center*: Pablo Pergola, Irene Leal, Melissa Cagle, Anna Romo, Anthony Torres; *Seacoast Kidney and Hypertension Specialists*: Sucharit Joshi, Kulli Barrett, Alexis Africano, Vicki Dodds, Dorleena Gowen, Ashlee Morris; *Total Research Group, LLC*: Juan Fernandez, Guillermo Jimenez, Ricardo Viera, Kendaling Bruce, Ryan Barrios, Maylin Garcia, Kerelyn Garcia, Iradis Leal; *Nephrology Consultants, LLC*: David Tietjen, David Bains, Carlo Castillo, Genielle Brewer, Justin Davis, Natalie Freking, Brittany Golson, Sally Ham, Jesslyn Roesch; *Sumter Medical Specialists*: Pusadee Suchinda, Shameem Beigh, Usah Lilavivat, Joyce Bilton, Kim Bocchicchia; *Yale University*: Jeffrey Turner, Neera Dahl, Aldo Peixoto, Yasemin Kavak, Lauren Liberti, Hari Nair, Nicolas Page, Stephanie Rosenberg, Kathryn Simmons; *Northwestern University*: Tamara Isakova, Rebecca Frazier, Rupal Mehta, Anand Srivastava, Patrick Fox, Jonathan Heckman, Alexander Hodakowski, Carlos Martinez, Rachel Phillips, Alexis Stevenson; *University of Kansas Medical Center*: Reem Mustafa, Kyle Jansson, Cassandra Kimber, Jason Stubbs, Ahmad Tuffaha, Sri Yarlagadda, Debbie Griffin, Elisabeth Laundry, Zhuo Tang; *Providence Sacred Heart Medical Center and Childrens Hospital*: Radica Alicic, Katherine R. Tuttle, Ann Cooper, Lisa Davis; *East Coast Research Institute*: Ashwini Gore, Rebecca Goldfaden, Leslie Harvill, Lisa Hichkad, Barry Johns, Thomas Jones, Kayla Merritt, Jennifer Sheldon, Jennifer Stanfield, Lindsay Alexander, Kaitlyn Preston, Lindsey Wood; *Monument Health*: Rajesh Pradhan, Roger DeRaad, Kelli McIntosh, Louis Raymond, Michael Shepperd, Susan McLaughlin, Mary Seifert, Andrew Shepherd; *Mountain Kidney & Hypertension Associates*: Joseph Aiello, William Durham, Laurie Loudermilk, John Manley, Sabrina Burnette, Stephanie Evans, Tara Johnson; *Texas Institute for Kidney and Endocrine Disorders*: Lance Sloan, Judy Ann Acosta, Stacy Gillham, Katia Sloan, SueAnn Squyres; *Wake Forest University Health Sciences*: Michael Rocco, Amret Hawfield, Ben Bagwell, Lauren Richmond; *Chase Medical Research*: Joseph Soufer, Subha Clarke, Amanda Aliu, Kristine Calabrese, Amanda Davis, Veronica Poma, Tracy Spinola; *East Coast Institute for Research LLC*: James Magee, Ricardo Silva, Rushab Choksi, Lorraine Dajani, John Evans, Anil George, Rebecca Goldfaden, Prasanth Krish, Gerard Martins, Mae Sheikh-Ali, David Sutton, Freda Driver, Abraham Hanburry, Laura Hume, Amber Hurst, Matthew Taddeo, Marla Turner, Veronica Yousif; *University of Utah Health Sciences*: Srinivasan Beddhu, Laith Al-Rabadi, Nikita Abraham, Amalia Caamano, Judy Carle, Victoria Gonce, Kaitlyn Staylor, Na Zhou; *University of Texas Health Science Center at San Antonio*: Shweta Bansal, Manoj Bhattarai, Kumar Sharma, Subrata Debnath, Aliseiya Garza, Chakradhar Velagapudi; *Academy of Diabetes, Thyroid, and Endocrine, PA*: Sergio Rovner, Javier Almeida, Pablo Casares, Verlaine Stewart-Ray, Rene Almaraz, Renata Dayrell, Ana Moncada, Ricardo Pulido, Roxana Rodriguez; *East Coast Institute for Research*: James Magee, Wasim Deeb, Kathryn DeGoursey, Rodel Gloria, Trevor Greene, Robert Miller, Edward Pereira, Miguel Roura, Mae Sheikh-Ali, David Sutton, Debbie Domingo, Sasha Dorestin, William Hodge, Cathy Jackson, Deborah Lund, Katrina Taylor; *Aventiv Research*: Kenneth Boren, Brittany Cleveland, Sandra Gaiser, Mandeep Sahani, Logan Aldrich, Exodus Edmerson, Edmond Limon, Cole Valletta, Patricia Vasquez; *St. Clair Nephrology Research*: Christopher Provenzano, Navkiranjot Brar, Heather Henderson, Bellovich Keith, Qur Khai,

Quresh Khairullah, Gail Makos, Joel Topf, Sherry Gasko, Rosemarie Henschel, Kaitlin Knapp, Teresa Kozlowski, Paula LaFleur, Ashwathy Varughese; *Kaiser Permanente San Diego*: Hui Xue, Patricia Wu, Olga Arechiga, Shan Darbeau, Michael Fechter, Stephanie Martinez; *Hanson Clinical Research Center*: Lenita Hanson, Nyla Cooper, Arelis Madera, Jay Cadorna, Rita Sheridan, Helen Sparks; *Saint Elizabeth Healthcare*: Bradley Eilerman, Susanne Bodine, Wael Eid, Rebecca Flora, Amber Avery, Cashmere Hardy; *Thomas Jefferson/ARIA Health Northeast Endocrine Metabolic Associates*: Mihaela Biscoveanu, Steven Nagelberg, Tracey Cummins; *Emory University*: Frederic Rahbari-Oskoui, Anju Oommen, Zohreh Forghani, Stacie Hitchcock, Darya Hosein, Diane Watkins; *East Coast Institute Research, LLC*: Minesh Patel, Anthony Lambert, Elizabeth Newman, Autumn Wood, Tammy Ross, Stephany Topping; *Kidney Care and Transplant Services of New England*: Jeffrey Mulhern, Lorna Murphy, Ann Vasseur; *Brookview Hills Research Associates LLC*: Gregory Greenwood, Alexander Hadley, Denise Laurienti, Christopher Marshall, Nicholas McLean, Scott Satko, Brandy Caudill, Jacob Maris, Janice Rogers, Cindy Vanhoy; *Cleveland Clinic*: George Thomas, Georges Nakhoul, John O'Toole, Jonathan Talierno, Leslie Cooperman, Marina Markovic, Barbara Tucky; *Salem V.A. Medical Center*: Devasmita Dev, Alia Hasan, Hima Yalamanchili, Namita Jain, Lesley McNeil, Eric Wines; *Medstar Health Research Institute*: Jean Park, Adline Ghazi, Mia Hamm, Tejas Patel; *University of North Carolina Hospital*: Amy Mottl, Emily Chang, Vimal Derebail, Emmie Cole, Anne Froment, Sara Kelley, Jordan Osmond Foster; *Olive View - UCLA Medical Center*: Vahid Mahabadi, Golriz Jafari, Anita Kamarzarian, Wendy Arriaga, Daisy Arteaga, Rosario Machicado, Genesis Naverrete; *P&I Clinical Research, LLC*: Prashant Kumar, Imran Nazeer, Karina Urquia, Tammi Glider, Vickie Jones, Savannah Rucker, Jennifer Wiley; *Pioneer Research Solutions*: Rahul Pandey, Jesus Arroyo, Harish Pariani, Mohammad Ahmad, Shahin Mozaffari, Erika Perez; *Los Angeles Biomedical Research Institute at Harbor-UCLA Medical Center*: Matthew Budoff, Sion Roy, Divya Birudaraju, Ahmed Ghanem, Sajad Hamal; *Research Institute of Dallas*: Stephen Aronoff, Elisa Joye Petr, Richard Sachson, Jaime Wiebel, Sana Akram, Laurie Jones, Curtis Knight; Maurie Tarlac; *Renal Disease Research Institute*: Shahbaz Ahmed, Harold Szerlip, Akinwande Akinfolarin, Ankit Mehta, Shana Camp, Cindy Castro, Zanaida Cooper, Jessica Terry; *Clinical Research Consultants*: Ahmed Awad, Bhavya Kothapalli, Ryan Lustig, Serine Alfaress, Hyder Jasim, Mary Parrigon; *Lexington V.A. Health Care System*: Dennis Karounos, Sadiq Ahmed, Maggie Berry, Ruth Oremus; *VA Southern Nevada Healthcare System*: Carlos Hernandez-Cassis, Elias Ugwu, Nazia Junejo, Nancy Suazo; *University of Florida Health*: Mark Segal, Amir Kazory, Sherry Brown, Tristan Daniels, Sofia Dayi, Renee Hogan, Kathy McCray, Jennifer Stickley; *University Hospitals Cleveland Medical Center*: Mahboob Rahman, Mirela Dobre, Lavinia Negrea, Aparna Padiyar, Nishigandha Pradhan, Arash Rashidi, Nagaraju Sarabu, Vicki Donley, Tricia Young; *Midland Florida Clinical Research Center*: Godson Oguchi, Judepatricks Onyema, Kahla Damianik, Jack Dienes, Judith Plummer-Morgan, Marilyn Roman, Mauver Skipper, Stacey-Ann Villaruel, Krystle Williams; *Cedar Crosse Research Center*: Danny Sugimoto, Jeffrey Dugas, Ismeal Ahmed, Jamie Bhairoo, Dolores Rijos, Huzaifa Salim

**UK:** *Oxford University Hospitals*: Richard Haynes, William G. Herrington, Doreen Zhu, Madita Gavrila, Kathryn Lafferty, Ria Rabara, Sally Ruse, Maria Weetman; *Southmead Hospital, Bristol*: James Bushnell, Albert Power, Alison Jenkins, Stefanie Jones, Amanda Scott; *Nottingham City Hospital*: Cath Byrne, Mark Jesky, Alison Cowley, Emma McHaffie, Holly Waterfall; *Dorset County Hospital*: Jo Taylor, Laura Bough, Thomas Phillips, Barbara Winter-Goodwin; *King's College Hospital, London*: Sui Phin Kon, Iain MacDougall, Eirini Lioudaki, Sapna Shah, Claire Sharpe, Francisco Aguilar, Abigail Hernandez Pena, Conception Pugay, Amelia Te; *Queen Elizabeth Hospital Birmingham*: Hugh Finn, Wasim Hanif, Samiul Mostafa, Alice Aitken, Katharine Draxlbauer, Evelina Grobovaite, Jennifer Kearney, Theresa McCarthy; *Royal Cornwall Hospital*: Giorgio Gentile, Duncan Browne, Palanichamy Chellamuthu, Tabinda Dugal, Terri Chant, Laura Jones, Emily Laity, Megan Miners, James Muir, Elizabeth Swanson; *Imperial College Healthcare NHS Trust*: Andrew Frankel, James Tomlinson, Marlon Alegata, Rashid Almasarwah, Anthoula Apostolidi, Maria Vourvou, Thomas Walters; *Royal Derby Hospital*: Maarten Taal, Hari Dukka, Nitin Kolhe, Carly McDonald, Kelly White;

*The Queen Elizabeth Hospital, King's Lynn:* Shiva Ugni, Smita Gunda, Rotimi Oluyombo, Vicki Brindle, Ping Coutts, Tracy Fuller, Evelyn Nadar; *Princess Royal Hospital, Telford:* Suresh Ramadoss, Denise Donaldson, Nichola Motherwell, Susannah Pajak, Louise Tonks; *Hull Royal Infirmary:* Sunil Bhandari, Richard Bodington, Adil Hazara, Dominic Fellowes; *University Hospital Aintree:* Christopher Wong, Christopher Goldsmith, Sherald Barnes, Ann Bennett, Claire Burston, Samantha Hope, Nicola Hunt, Lini Kurian; *UHNM Royal Stoke University Hospital:* Richard Fish, Daniela Farrugia, Judy Lee, Emma Sadler, Hannah Turner; *Belfast City Hospital:* Christopher Hill, Henry Brown, Agnes Masengu, Peter Maxwell, Nina Bleakley, Hugh Murtagh; *West Suffolk NHS Foundation Trust:* William Petchey, Vivian Yiu, Joanne Kellett, Angharad Williams; *Royal Devon and Exeter Hospital:* Helen Clarke, Victoria Carnall, Sarah Benyon, Caroline Blake, Stephanie Estcourt, Jane Piper; *Daisy Hill Hospital:* Neal Morgan, Carolyn Hutchinson, Teresa McKinley; *Ulster Hospital, Dundonald:* Alastair Woodman, Judi Graham, Niall Leonard, John Smyth, Vicki Adell, Samantha Hagan; *Royal Free London NHS Foundation Trust:* Ben Caplin, Amin Oomatia, Eleanor Damian, Toluleyi Sobande; *Kent & Canterbury Hospital:* Tim Doulton, Michael Delaney, Mahmoud Montasser, Jenny Hansen, David Loader, Angela Moon, Frances Morris; *Salford Royal NHS Foundation Trust:* Smeeta Sinha, Chukwuma Chukwu, Amy Hudson, Diane Campbell, Melanie Kershaw, Stephanie Whittaker; *Brighton and Sussex University Hospital's NHS Trust:* Ayesha Irtiza-Ali, Farid Ghalli, Heba Nosseir, Allison Leslie, Kate Trivedi; *University Hospital of Wales, Cardiff:* Donald Fraser, Mohammad Alhadj Ali, Sian Griffin, Farah Latif, Justyna Witczak, Alexa Wonnacott, Lynda Jeffers, Yvette Webley; *Edinburgh Royal Infirmary:* Paul Phelan, Eve Miller-Hodges, Ailsa Geddes, Margaret Glenwright, Amy Hunter; *Gloucestershire Hospitals NHS Foundation Trust:* Thomas Pickett, Jim Moriarty, Linda Hill, Amanda Tyler; *University Hospitals Coventry and Warwickshire:* Waqar Ayub, Gail Evans, Sue Hewins, Davina Hewitt, Kerry Read; *Ninewells Hospital:* Samira Bell, Leanne Cosgrove, Rachel Craik, Shona Murray; *Royal Berkshire Hospital, Reading:* Nitin Bhandary, Holly Coles, Rashmi Easow, Maya Joseph; *Northern General Hospital, Sheffield:* Arif Khwaja, Yvonne Jackson, Angeline Mbuyisa, Rachel Sellars; *Darent Valley Hospital, Dartford:* Nihil Chitalia, Cynthia Mohandas, Anca Gherman, Charlotte Kamundi, Olumide Olufuwa; *Royal London Hospital:* Kieran McCafferty, Adedolapo Adeleke, Cara Healy, Damini Jeyarajah, Edward Kinsella-Perks; *Ipswich Hospital:* Richard Smith, Brian Camilleri, Carol Buckman, Jenny Finch, Vanessa Rivers; *University Hospitals Plymouth NHS Trust:* Andrew Connor, Sheila Carr, Lisa Shainberg; *Cheltenham General Hospital:* Thomas Pickett, Linda Hill, Amanda Tyler; *St. James's University Hospital, Leeds:* Andrew Lewington, Richard Baker, Suzannah Dorey, Kay Tobin, Rosalyn Wheatley; *St. George's University Hospitals NHS Foundation Trust:* Debasish Banerjee, Richard Hull, Sharirose Abat, Riny Paul; *Norfolk and Norwich University Hospitals:* Mahzuz Karim, Zay Htet, Rotimi Oluyombo, Saad Tufail, Ravi Varma, Karen Convery, Deirdre Fottrell-Gould, Lisa Hudig, Emily Tropman; *Walsall Healthcare NHS Trust:* Thahir Abdul-Samad, Anne Grace, Marie Phipps; *St Helier Hospital, Carshalton:* Rebecca Suckling, Subash Somalanka, Bhriugu Sood, Pauline Swift, Sarah Acheampong, Kwame Ansu, Martia Augustin; *Wessex Kidney Centre, Queen Alexandra Hospital, Portsmouth:* Anna Sampson, Lynn Vinall, Kim Wren; *St Bartholomew's Medical Centre:* Shamila Wanninayake, Nicholas Wooding, Heather Edwards, Lydia Owen; *Antrim Area Hospital:* Stephanie Bolton, Marion Carson, Michael Matthews; *University Hospitals of Leicester:* Nigel Brunskill, Jorge Jesus-Silva, Alex Howson, Mary Quashie-Akponeware; *North Middlesex University Trust Diabetes Department, North Middlesex University Hospital:* Hilary Tindall, Chidambaram Nethaji, Helen Eldon; *Glasgow Clinical Research Facility, Queen Elizabeth University Hospital:* Rajan Patel, Patrick Mark, Alastair Rankin, Michael Sullivan, Kirsty Forsyth, Rowan McDougall; *Great Western Hospital, Swindon:* Tanaji Dasgupta, Louisa Davies, Maggie Ryder; *Hathaway Medical Centre, Chippenham:* Philip Grimmer, Clare Macdonald, Mary Webster; *Newcastle:* Timothy Ellam, Edwin Wong, Christine Meshykhi, Andrea Webster, Peter Wilson; *Lister Hospital:* Enric Vilar, Jocelyn Berdeprado, Eunice Doctolero, Lily Wilkinson; *Altnagelvin Hospital, Western Health & Social Care Trust:* Frank McCarroll, Hesham Ammar, Ying Kuan, Conor Moran, Girish Shivashankar, Ryan Campbell, Deborah Glowski, Paula McDermott;

*Oakenhurst Medical Practice, Blackburn:* Amar Ali, Zuber Patel, Christine Bond, Gillian Whalley

**China:** *National Clinical Research Center of Kidney Diseases, Jinling Hospital, Nanjing University School of Medicine:* Haitao Zhang, Peiling Chen, Yu An, Yinghua Chen, Liu Yang, Lihua Zhang, Tingting Kan, Ling Zhu; *The Second Affiliated Hospital of Army Medical University, PLA:* Jinghong Zhao, Weiping Hou, Jing Wu; *Beijing Anzhen Hospital, Capital Medical University:* Hong Cheng, Weijing Bian, Zhirui Zhao; *Henan Provincial People's Hospital:* Fengmin Shao, Huixia Cao, Xiaojing Jiao, Peiyuan Niu; *Shanghai Fifth People's Hospital, Fudan University:* Jianying Niu, Yu Chen, Lihong Zhang; *Huazhong University of Science and Technology Union Shenzhen Hospital:* Shenglang Zhu, Haiyan Lin, Shaopeng Yao, Jiehui Chen, Ying Jiang; *The second affiliated hospital of Zhejiang University School of Medicine:* Ying Hu, Huaying Xiao, Fuye Yang; *Shenzhen People's Hospital:* Xinzhou Zhang, Baochun Guo, Qiu Jin, Lixia Liu; *Xiangya Hospital, Central South University:* Xiangcheng Xiao, Yanyun Xie, Ting Meng; *Wuhan Fourth Hospital:* Chuanwen Xu, Jie Huang, Yanmei Xu; *Suzhou Kowloon Hospital:* Weixin Kong, Xiaoliang Wang, Qianpan Liu.; *Jinzhou Central Hospital:* Xueying Wang, Ming Gao; *Zhuzhou Central Hospital (Nephrology):* Xiumei Hu, Ying Lu; *Sichuan Provincial People's Hospital:* Li Wang, Kun Peng, Wei Wang; *Fuwai Hospital, Chinese Academy of Medical Sciences:* Qihong Gong, Jianfang Cai, Xiaojuan Li, Xuejiao Liu, Haitao Zhang, Shuhan Zhou; *Zhuzhou Central Hospital (Endocrinology):* Hong Liu, Yao Weng, Shuai Tang, Yao Yao; *The Central Hospital of Wuhan:* Shi Zhao, Chen Cheng, Wei Wei, Na Li

**Malaysia:** *Hospital Kajang:* Sadanah Aqashiah Mazlan, Alia Zubaidah Bahtar, Elliyyin Katiman, Noraini Othman; *Hospital Tuanku Ja'afar:* Lily Mushahar, Nurdiana Mazlan, Nur Sharafina Safiee, Sarasa Ramasamy; *Hospital Selayang:* Hin Seng Wong, Hajar Ahmad Rosdi, Esther Zhao Zhi Tan, Ju Fan Tay; *Hospital Taiping:* Kok Seng Teng, Hasnah Yahaya; *Hospital Sultanah Aminah:* Wen Jiun Liu, Lik Wee Ee, Kenneth Kay Leong Khoo, Yuana Mohd Yusoff; *Hospital Tengku Ampuan Afzan:* Fariz Safhan Mohamad Nor, Mohd Kamil Ahmad, Mohd Ramli Seman; *Hospital Umum Sarawak:* Clare Hui Hong Tan, Laura Lui Sian Ngu, Jaime Yoke May Chan, Javelin Peji; *Hospital Raja Permaisuri Bainun:* Chek Loong Loh, Yee Yan Lee, Sridhar Ramanaidu, Kah Mean Thong, Yik Hong Wong, Suria Junus; *Hospital Sultanah Bahiyah:* Chen Hua Ching, Mohammad Faisal Asmee, Ku Ruziana Ku Md Razi, Chun Leong Low, Christopher Sze Bing Sim, Zhang Duan Tham, Noor Kamila Abdullah; *Hospital Sultan Abdul Halim:* Tai Meng Chen, Yong Chieh Chan, Eason Chang, Huan Yean Kang, Kai Quan Lee, Sue Ann Lee, Aik Kheng Lee, Jeevika Vinathan; *Universiti Kebangsaan Malaysia Medical Centre:* Rizna Abdul Cader, Ruslinda Mustafar, Lydia Kamaruzaman, Rozita Mohd, Rahimah Ismail; *Hospital Kulim:* Chong Men Leong, Chee Koon Low, Liang Wei Wong, Norlezah Adnan, Sabariah Ibrahim; *Hospital Kuala Lumpur:* Mohamad Zaimi Abdul Wahab, Sunita Bavanandan, Yik Shen Lim, Zhang Duan Tham, Wan Hazlina Wan Mohamad, Siti Munirah Jaafar, Nur Ashykeen Mohd Fauzi, Aziee Sudin; *University Malaya Medical Centre:* Soo Kun Lim, Chye Chung Gan, Albert Hing, Wan Ahmad Faizal Alaidin Razali; *Hospital Pulau Pinang:* Yew Fong Liew, Chelsia Bao Tyng Chan, Mei Chih Cheng, Yu Chen Ong, Loke Meng Ong, Farah Amalina Mohamed Affandi; *Hospital Melaka:* Korina Rahmat, Ban Chai Peng, Masayu Amat; *Hospital Pakar Sultanah Fatimah:* Nuzaimin Hadafi Ahmad, Doo Yee Mah, Yi Loon Tye, Zaid Azhari, Siti Nabilah Mohamad Zaini, Mohd Aidil Musa; *Hospital Ampang:* Norazinazah Ahmad Miswan, Rafizanur Ramli, Nor Aziah Ahmad; *Hospital Serdang:* Bak Leong Goh, Nurul Izah Ahmad, Fairol Huda Ibrahim, Tze Jian Ng, Malini Shanmuganathan, Li Lian Tay; *Hospital Sultanah Nur Zahirah:* Zaiha Harun, Salmi Ramli, Nurul 'Ain Yusof, Rossenizal Abd Rahman; *Pusat Perubatan UiTM:* Muhammad Iqbal Abdul Hafidz, Nur Hidayati Mohd Sharif, Irda Yasmoon Awang

**Japan:** *Chubu Rosai Hospital:* Eitaro Nakashima, Rui Imamine, Makiko Minatoguchi, Yukari Miura, Miduki Nakaoka, Yoshiki Suzuki, Hitomi Yoshikawa; *Shin Clinic:* Koki Shin, Kanae Fujita, Misuzu Iwasa, Haruka Sasajima, Airi Sato; *Kansai Electric Power Hospital:* Yoshiyuki



Hamamoto, Yuki Fujita, Takuya Haraguchi, Takanori Hyo, Kiyohiro Izumi, Toshiyuki Komiya, Sodai Kubota, Takeshi Kurose, Hitoshi Kuwata, Susumu Nakatani, Kaori Oishi, Saki Okamoto, Kaori Okamura, Jun Takeoka, Nagaaki Tanaka, Katsuya Tanigaki, Naohiro Toda, Koin Watanabe, Hiromi Komori, Rika Kumuji, Asako Takesada, Aya Tanaka; *Nagoya University Hospital*: Shoichi Maruyama, Tomonori Hasegawa, Akiko Ishiguro, Takuji Ishimoto, Kazuhiro Ito, Yutaka Kamimura, Noritoshi Kato, Sawako Kato, Hiroshi Kojima, Tomoki Kosugi, Kayaho Maeda, Masasi Mizuno, Shoji Saito, Hitomi Sato, Yuka Sato, Yasuhiro Suzuki, Akihito Tanaka, Yoshinari Yasuda, Fujiko Hasegawa, Maiko Hayashi, Shizuka Higashi, Kaho Shimamura, Momoko Sumi, Kazuki Tajima, Chimaki Unekawa, Kana Wakayama, Yukiko Wakita; *Ota diabetes clinic*: Takatoshi Otani, Ayako Imai, Sayaka Kawashima, Eri Kogure, Tomoe Sato, Misato Takezawa, Shinya Yoshida; *Fukui Prefectural Hospital*: Hideo Araki, Yuko Katsuda, Masahiro Konishi, Takahiro Matsunaga, Masashi Oe, Kunihiro Ogane, Masato Sakai, Tomoko Takahashi, Takahiro Yamano, Takuya Yokoyama, Hitomi Ito, Masayo Katayama, Emi Kuroda; *Medical Corporation Seijinkai Ikeda Hospital*: Toru Ikeda, Takuma Kojo, Etsuo Yoshidome, Rieko Mizumachi, Akane Yamamoto, Narihisa Yamasaki, Yoshihiko Yamasaki; *Okayama University Hospital*: Jun Wada, Jun Eguchi, Chigusa Higuchi, Akihiro Katayama, Masaru Kinomura, Masashi Kitagawa, Shinji Kitamura, Satoshi Miyamoto, Hiroshi Morinaga, Atsuko Nakatsuka, Ichiro Nojima, Kenichi Shikata, Hitoshi Sugiyama, Katsuyuki Tanabe, Kenji Tsuji, Haruhito Uchida, Mayu Watanabe, Chie Hashimoto, Takahiro Kato, Sayaka Yamamoto; *Tokai University Hospital*: Takehiko Wada, Masafumi Fukagawa, Naoto Hamano, Masahiro Koizumi, Hirotaka Komaba, Yosuke Nakagawa, Michiyo Iwamoto; *Fukuoka University Hospital*: Kosuke Masutani, Akane Katanosaka, Mayu Kiyota, Hikari Uchi, Yuka Ueda, Sonoka Yamamoto; *Kawasaki Medical School Hospital*: Hajime Nagasu, Seiji Itano, Tsukasa Iwakura, Hiroyuki Kadoya, Eiichiro Kanda, Naoki Kashihara, Kengo Kidokoro, Megumi Kondo, Tamaki Sasaki, Minoru Satoh, Atsuyuki Tokuyama, Reina Umeno, Yoshihisa Wada, Toshiya Yamamoto, Yu Yamanouchi, Masumi Abe, Yoko Inukai; *Kobe University Hospital*: Wataru Ogawa, Shunichiro Asahara, Hideki Fujii, Shunsuke Goto, Yushi Hirota, Tetsuya Hosooka, Keiji Kono, Shinichi Nishi, Yuko Okada, Kazuhiko Sakaguchi, Kenji Sugawara, Michiko Takahashi, Tomoko Takai, Yoshikazu Tamori, Kentaro Watanabe, Miyu Kitajima, Misaki Nishi, Junko Wada; *Aichi Medical University Hospital*: Yasuhiko Ito, Hideki Kamiya, Akimasa Asai, Nao Asai, Saeko Asano, Shogo Banno, Yohei Ejima, Hanako Hase, Tomohide Hayami, Tatsuhito Himeno, Takahiro Ishikawa, Mayumi Ito, Shiho Iwagaitsu, Rina Kasagi, Yoshiro Kato, Makoto Kato, Koichi Kato, Takayuki Katsuno, Miyuka Kawai, Hiroshi Kinashi, Masaki Kondo, Masako Koshino, Naoya Matsuoka, Yoshiaki Morishita, Mikio Motegi, Jiro Nakamura, Hiromi Shimoda, Hirokazu Sugiyama, Shin Tsunekawa, Makoto Yamaguchi, Kazuyo Takahashi; *Juntendo University Hospital*: Hirotaka Watada, Takashi Funayama, Yasuhiko Furukawa, Tomohito Gohda, Hiromasa Goto, Hideyoshi Kaga, Yasuhiko Kanaguchi, Akio Kanazawa, Kayo Kaneko, Toshiki Kano, Masao Kihara, Shogo Kimura, Takashi Kobayashi, Masayuki Maiguma, Yuko Makita, Satoshi Mano, Tomoya Mita, Takeshi Miyatsuka, Maki Murakoshi, Masahiro Muto, Masami Nakata, Junichiro Nakata, Yuya Nishida, Nao Nohara, Takeshi Ogihara, Daisuke Sato, Junko Sato, Hiroaki Sato, Yusuke Suzuki, Ruka Suzuki, Hitoshi Suzuki, Miyuki Takagi, Yoshifumi Tamura, Toyoyoshi Uchida, Seiji Ueda, Miki Asawa, Minako Miyaji, Eri Nagashima, Yoshie Shibata, Eri Yanagisawa; *The University of Tokyo School of Medicine/Toranomon Hospital*: Takashi Kadowaki, Toshimasa Yamauchi, Masaomi Nangaku, Yosuke Hirakawa, Hiroshi Nishi, Nobuhiro Shojima, Satoko Horikawa, Yukiko Nakayama, Naoko Yamada, Yuki Omori; *Maebashi Hirosegawa Clinic*: Shintaro Yano, Miyabi Ioka, Nahoko Kuwabara, Remi Nagano, Megumi Nozawa, Yumi Osawa; *Shiga University of Medical Science Hospital*: Hiroshi Maegawa, Shinji Kume, Shinichi Araki, Itsuko Miyazawa, Katsutarō Morino, Ikuko Kawai, Masumi Sobata, Motoko Takaoka; *Koukan Clinic*: Yasushi Iwaita, Takashi Udagawa, Ami Inamori, Aya Kawase, Aya Yamanaka; *University of Tsukuba Hospital*: Hitoshi Shimano, Akiko Fujita, Hitoshi Iwasaki, Hirayasu Kai, Yoshinori Osaki, Chie Saito, Motohiro Sekiya, Ryoya Tsunoda, Kunihiro Yamagata, Rikako Nakamura, Aiko Yamada; *Center Hospital of the National Center for Global Health and Medicine*: Mitsuru Ohsugi, Motoharu Awazawa, Ryotaro Bouchi, Shota Hashimoto, Makiko Hashimoto, Tomoko Hisatake, Noriko Ihana, Koko Ishizuka, Kazuo Izumi, Hiroshi Kajio, Michi Kobayashi, Noriko

Kodani, Koji Maruyama, Michihiro Matsumoto, Maya Matsushita, Tomoka Nakamura, Takehiro Sugiyama, Akiyo Tanabe, Aiko Terakawa, Kojiro Ueki, Yuko Orimo, Takako Ozawa, Eriko Takahira; *AMC Nishi-Umeda Clinic*: Yoshimitsu Yamasaki, Masakazu Haneda, Tadahiro Tomita, Saori Akimoto, Akihiro Fujimoto, Kenji Ishihara, Chiho Murakami, Akiyo Nishiyama, Yukiko Toyonaga, Kana Uozumi, Yukihiko Yamaji; *Jyoumou Ohashi Clinic*: Tetsuya Shigehara, Jun Okajyo, Yukihiko Shimizu; *Iwasaki internal medicine clinic*: Shingo Iwasaki, Yuki Fukao, Megumi Furusho, Shintaro Nunokawa; *Tohoku University Hospital*: Hideki Katagiri, Tomohito Izumi, Keizo Kaneko, Shinjiro Kodama, Mariko Miyazaki, Yuichiro Munakata, Tasuku Nagasawa, Yuji Oe, Hiroto Sugawara, Kei Takahashi, Kazushige Hirata, Keiko Inomata, Shoko Otomo, Taeko Uchida, Chigusa Yamashita; *Tokyo-eki Center-building Clinic*: Arihiro Kiyosue, Ryota Tamura

**Canada:** *CRIUCPQ*: Francois Dube, Marilene Bolduc, Marie-Christine Talbot; *University Health Network-Toronto General Hospital*: David Cherney, Leslie Cham, Vesta Lai, Josephine Tse; *Clinical Research Solutions Inc.:* Shivinder Jolly, Tabatha Duck; *Interior Health Kelowna General Hospital*: Scott Lyle, Rachel Epp, Camille Galloway, Susan Haskett, Elizabetha Matvienko, Liam Paulsen; *London Health Sciences Centre*: Louise Moist, Kerri Gallo, Zabrina Lozon, Tina Ramsey, Brittany Whitmore; *St Paul's Hospital*: Adeera Levin, Bader Al-Zeer, Paula Macleod, Aoife O'Sullivan, Zainab Sheriff, Sam Tholl; *Cambridge Cardiac Care Centre*: Amritanshu Pandey, Samantha Armstrong, Bethelihem Gebeyehu, Patrick Toth; *LMC Clinical Research Inc. (Thornhill)*: Ronald Goldenberg, Mahsa Jahangiriesmaili, Shariff Sanguila, Neethi Suresh, Tanvi Talsania; *Vancouver General Hospital*: Nadia Zalunardo, Bader Al-Zeer, Paula Macleod, Aoife O'Sullivan, Zainab Sheriff; *CHU de Quebec-Universite Laval*: Mohsen Agharazii, Marie-Pier Roussel, Annie Saillant, France Samson; *LMC Clinical Research Inc. Brampton*: Harpreet Bajaj, Miken Bhavsar, Parul Dhall, Gagandeep Dhillon, Bhupinder Grewal, Taniya Nimbkar; *CIUSSS Nord de l'ile de Montreal*: Francois Madore, Guylaine Marcotte; *LMC Clinical Research Inc. (Bayview)*: Oren Steen, Mathura Bullen, Shayani Raguwaran, Andre Valleteau; *CIUSSS de l'Estrie-CHUS, Hopital Fleurimont*: Marie-France Langlois, Christine Brown; *Lakeridge Health*: Andrew Steele, Melissa Garrity, Taneera Ghathe, Holly Robinson, Michael Tolibas; *LMC Clinical Research Inc. (Ottawa)*: Chetna Tailor, Lauren Elliott, Christine McClary-Wright; *Fadia El Boreky Medicine Professional*: Fadia Boreky, Sameh Fikry, Ayesha Ali, Chintankumar Barot, Wagdy Basily, Bethelihem Gebeyehu, Thisun Saram, Vinay Varad; *LMC Clinical Research Inc (Etobicoke)*: Hasnain Khandwala, Alex Aguilera, Patricia Alvarez, Balwinder Gill, Nazihah Huda, Aamir Navivala, Daniel Pinto; *Kidney Care Centre-Fraser Health*: Micheli Bevilacqua, Elaine Fung, Geraldine Hernandez, Puneet Mann, Jaskiran Saini; *Institut de recherches cliniques de Montreal*: Remi Rabasa-Lhoret, Danijela Bovan, Marie Devaux

**Italy:** *Policlinico San Martino, Genova*: Roberto Pontremoli, Cecilia Barnini, Giovanna Leoncini, Luca Manco, Giulia Nobili; *Ospedale Casa Sollievo della Sofferenza, San Giovanni Rotondo*: Matteo Piemontese, Filippo Aucella, Rachele Grifa, Francesco Totaro; *Policlinico S. Orsola-Malpighi, Bologna*: Gaetano La Manna, Irene Capelli, Giuseppe Cianciolo, Sarah Lerario, Fulvia Zappulo; *Ospedale S. Giovanni di Dio, Firenze*: Alberto Rosati, Filippo Fani, Giuseppe Spatoliatore, Ester Baldini, Francesca Bianchini; *AOU Policlinico, Bari*: Loreto Gesualdo, Francesco Pesce, Maria Russo, Maria Zippo, Cesira Cafiero; *Ospedale Martini, Torino*: Daria Motta, Simona Bianco, Donatella Bilucaglia; *Ospedale Maggiore Policlinico, Milano*: Piergiorgio Messa, Laura Pavone, Federica Tripodi, Simone Vettoretti; *AOU Padova*: Paola Fioretto, Gianni Carraro, Filippo Farnia, Anna Postal; *Ospedale Sacro Cuore di Gesù, Gallipoli*: Alessandro D'Amelio, Antonio Cardone, Giovanni Piccinni, Annalisa Aloisi; *ASST Spedali Civili, Brescia*: Francesco Scolari, Federico Alberici, Alice Guerini, Chiara Saccà, Chiara Salviani, Roberta Zani; *AOU L. Vanvitelli, Napoli*: Luca De Nicola, Carlo Garofalo, Maria Elena Liberti, Roberto Minutolo, Luigi Pennino, Lucio Polese; *AOU Sant' Andrea, Roma*: Paolo Mené, Simona Barberi, Clorinda Falcone; *Ospedale Ignazio Veris dell*

*Ponti, Scorrano*: Francesco Russo, Maurizio Caroppo; *Ospedale di Circolo, Desio*: Gennaro Santorelli, Rodolfo Rivera; *AOU Policlinico G. Martino, Messina*: Domenico Santoro, Alfio Giuffrida, Fortunata Zirino; *Ospedale Civile SS. Antonio e Biagio, Alessandria*: Cristina Calvi, Luca Estienne; *AOU, Verona*: Giovanni Gambaro, Concetta Gangemi, Vittorio Ortalda, Giuseppina Pessolano; *Fondazione Policlinico Universitario Agostino Gemelli, Roma*: Giuseppe Grandaliano, Rocco Baccaro, Pietro Ferraro, Roberto Mangiacapra; *IRCCS Ospedale San Raffaele, Milano*: Marco Melandri, Nadia Foligno, Rita Quartagno, Giuseppe Vezzoli, Elena Brioni

## Supplementary Methods

### **Approach to Recording of Outcomes, Adjudication and Outcome Definitions**

See next page

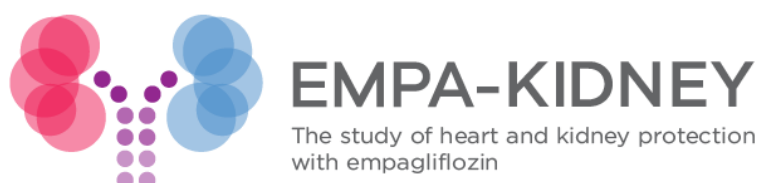

# Approach to Recording of Outcomes, Adjudication and Outcome Definitions

## Standard Operating Procedure 9a EDMS 5452 Version 1.1

| <b>Version</b> | <b>Date</b>                    | <b>Comments</b>                                                                                                          |
|----------------|--------------------------------|--------------------------------------------------------------------------------------------------------------------------|
| V1.0           | 11 <sup>th</sup> January 2018  | First release                                                                                                            |
| V1.1           | 7 <sup>th</sup> September 2021 | Update to include serious genital infection definitions and refinements agreed with the Steering Committee (from SOP9b). |

## TABLE OF CONTENTS

|          |                                                                                                       |           |
|----------|-------------------------------------------------------------------------------------------------------|-----------|
| <b>1</b> | <b>INTRODUCTION.....</b>                                                                              | <b>3</b>  |
| 1.1      | EMPA-KIDNEY PRIMARY AND KEY SECONDARY OUTCOMES .....                                                  | 3         |
| 1.2      | PRINCIPLES OF STREAMLINED OUTCOME RECORDING IN EMPA-KIDNEY .....                                      | 4         |
|          | 1.2.1 <i>Recording of outcomes based on clinical events</i> .....                                     | 4         |
|          | 1.2.2 <i>Recording of outcomes based on eGFR</i> .....                                                | 4         |
| 1.3      | PRINCIPLES OF STREAMLINED ADJUDICATION IN EMPA-KIDNEY.....                                            | 5         |
|          | 1.3.1 <i>Selected clinical outcomes and laboratory values will not be centrally adjudicated</i> ..... | 5         |
|          | 1.3.2 <i>Approach to clinical adjudication</i> .....                                                  | 5         |
| <b>2</b> | <b>END-STAGE KIDNEY DISEASE .....</b>                                                                 | <b>7</b>  |
| 2.1      | DEFINITION .....                                                                                      | 7         |
|          | 2.1.1 <i>Initiation of maintenance dialysis</i> .....                                                 | 7         |
|          | 2.1.2 <i>Receipt of a kidney transplant</i> .....                                                     | 7         |
| <b>3</b> | <b>DEATH.....</b>                                                                                     | <b>8</b>  |
| 3.1      | DEFINITION .....                                                                                      | 8         |
| 3.2      | CARDIOVASCULAR DEATHS .....                                                                           | 8         |
|          | 3.2.1 <i>Myocardial infarction death</i> .....                                                        | 8         |
|          | 3.2.2 <i>Other coronary heart disease death</i> .....                                                 | 9         |
|          | 3.2.3 <i>Other cardiac disease death (including sudden cardiac death)</i> .....                       | 9         |
|          | 3.2.4 <i>Stroke death</i> .....                                                                       | 10        |
|          | 3.2.5 <i>Other cardiovascular death</i> .....                                                         | 11        |
|          | 3.2.6 <i>Unexplained death</i> .....                                                                  | 11        |
| 3.3      | NONCARDIOVASCULAR DEATH .....                                                                         | 11        |
|          | 3.3.1 <i>Renal death</i> .....                                                                        | 11        |
|          | 3.3.2 <i>Infection death</i> .....                                                                    | 12        |
|          | 3.3.3 <i>Cancer death</i> .....                                                                       | 12        |
|          | 3.3.4 <i>Other specific medical causes of death</i> .....                                             | 12        |
|          | 3.3.5 <i>Non-medical death</i> .....                                                                  | 12        |
| <b>4</b> | <b>HOSPITALIZATION FOR HEART FAILURE.....</b>                                                         | <b>14</b> |
| 4.1      | DEFINITION .....                                                                                      | 14        |
| 4.2      | SUPPORTING EVIDENCE.....                                                                              | 14        |
|          | 4.2.1 <i>Admission to inpatient care and staying at least one night in hospital</i> .....             | 14        |
|          | 4.2.2 <i>New or worsening symptoms of heart failure</i> .....                                         | 14        |
|          | 4.2.3 <i>Evidence of heart failure on physical examination or on investigations</i> .....             | 14        |
|          | 4.2.4 <i>Treatment for heart failure during the admission</i> .....                                   | 15        |
| <b>5</b> | <b>SAFETY OUTCOMES .....</b>                                                                          | <b>16</b> |
| 5.1      | KETOACIDOSIS .....                                                                                    | 16        |
| 5.2      | LOWER LIMB AMPUTATION .....                                                                           | 16        |
| 5.3      | ACUTE KIDNEY INJURY .....                                                                             | 16        |
| 5.4      | SERIOUS GENITAL INFECTIONS, INCLUDING FOURNIER’S GANGRENE .....                                       | 17        |
| 5.5      | LIVER-RELATED OUTCOMES.....                                                                           | 17        |
| 5.6      | FRACTURES.....                                                                                        | 18        |
| <b>6</b> | <b>REFERENCES.....</b>                                                                                | <b>19</b> |

## 1 INTRODUCTION

This document describes the streamlined approach to outcome recording and adjudication and includes the primary, secondary and selected safety outcome definitions for the EMPA-KIDNEY trial. Where appropriate, the Cardiovascular and Stroke Endpoint Definitions for Clinical Trials developed by the Standardized Data Collection for Cardiovascular Trials Initiative (SCTI) are incorporated.<sup>1</sup>

The existence of barriers to conducting sufficiently large clinical trials is well-recognized,<sup>2</sup> and there is a particular need for more large trials in nephrology.<sup>3</sup> The amount and type of data collected in a clinical trial affect the ability to recruit patients, follow their progress, and complete the trial. Inefficiencies in data collection also increase trial costs and the burden of participation for both patients and research teams. To date, trials in patients with kidney disease have tended to collect too many data fields in too few participants, leading to unnecessary complexity and limited power to assess hard clinical outcomes.<sup>3</sup>

The concept of trial “streamlining” requires design and conduct to focus on the main determinants of trial quality and avoid unnecessary elements that increase cost and complexity. For example, verification by central clinician review (often referred to as outcome adjudication) may have little effect on the relative risks reported by trials,<sup>4</sup> and a simplified approach could be considered in certain situations.

EMPA-KIDNEY aim is to assess the effect of empagliflozin 10 mg once daily versus matching placebo on a cardiorenal composite primary outcome in around 6000 participants with established chronic kidney disease (CKD) with or without diagnosed diabetes mellitus.

### 1.1 *EMPA-KIDNEY primary and key secondary outcomes*

The EMPA-KIDNEY study’s composite primary outcome is kidney disease progression or cardiovascular death. Kidney disease progression is defined as:

- End-stage kidney disease (ESKD)
- A sustained estimated glomerular filtration rate (eGFR) <10 mL/min/1.73m<sup>2</sup>
- Renal death, or
- A sustained decline of ≥40% in eGFR from randomization.

For the purposes of this trial, ESKD is defined as:

- Initiation of maintenance dialysis; or
- Receipt of a kidney transplant.

The key secondary outcomes include:

- Time to first hospitalization for heart failure or cardiovascular death
- Occurrences of all-cause hospitalizations (first and recurrent)
- Time to death from any cause.

The study's tertiary and safety outcomes are listed in Protocol Sections 2.3.1-2.3.2.

## **1.2 Principles of streamlined outcome recording in EMPA-KIDNEY**

### **1.2.1 Recording of outcomes based on clinical events**

The study uses Quality-by-Design<sup>5</sup> approaches to prospectively build quality into the study design and operations rather than relying on retrospective monitoring. All study data are processed electronically using a set of custom-written applications developed to meet the requirements of the Protocol, ICH-Good Clinical Practice, and 21 CFR Part 11.

Information about clinical outcomes and adverse events are derived from regularly scheduled participant interviews performed by Local Clinical Centre (LCC) clinical staff at around 230 LCCs internationally. Those conducting the participant interviews are referred to as LCC Research Co-ordinators. They are usually qualified nurses, but in some cases may be medically qualified or have other relevant qualifications and experience. All individuals fulfilling this role receive study-specific training to perform interviews and code adverse events using MedDRA. Appropriate levels of Local Investigator support and oversight is provided. Information on clinical outcomes is collected, regardless of whether the participant continues to take study treatment or not and is entered in real-time directly into electronic case report forms.

The trial monitoring plan is tailored to the protocol and takes a risk-based approach.<sup>6</sup> It includes central monitoring of adverse event reporting. Wherever possible, on-site monitors observe a participant's study visit during a monitoring visit. This assesses the quality of participant interviews.

This large trial is event-driven, double-blind and placebo-controlled, so missing a small proportion of events (e.g. a participant forgets that they were admitted to hospital) would not bias the estimates of the relative effects of study treatment.<sup>7</sup> Therefore paper or electronic hospital notes are not routinely reviewed by LCC clinical staff nor by on-site monitors to identify outcomes or other adverse events. All locally reported clinical outcomes and adverse events entered by the LCC Research Co-ordinators are reviewed and electronically approved by a Local Investigator.

### **1.2.2 Recording of outcomes based on eGFR**

Outcomes based on eGFR will be calculated using the CKD-EPI formula<sup>8</sup> from a single measurement of creatinine from each participant at their Randomization Visit and at each Follow-up visit. Follow-up visits are scheduled at 2 and 6 months after randomization and then 6-monthly. More than one baseline measurement is not required as this is a large trial and performing multiple baseline creatinine measurements to account for day-to-day variability (and any measurement error) adds considerable operational complexity without substantial improvement in statistical sensitivity (i.e. is not streamlined).

A single creatinine result from blood samples collected around the time of each scheduled visit will be used in assessments as this ensures bias is not



introduced by differences between treatment arms in the extent to which extra creatinine measurements are made outside of visits.

A *sustained* decline in eGFR to  $<10$  mL/min/1.73m<sup>2</sup> and a *sustained* decline of  $\geq 40\%$  in eGFR are required to be:

- i. Measured at two consecutive scheduled study follow-up visits; or
- ii. Measured at the last scheduled study follow-up visit, or the last scheduled visit before death (or withdrawal of consent).

Outcomes (and components) purely based on laboratory values (e.g. sustained  $\geq 40\%$  decline in eGFR) will not be adjudicated and analyses will emphasize the results of measurements made at central laboratories.

### **1.3 Principles of streamlined adjudication in EMPA-KIDNEY**

#### **1.3.1 Selected clinical outcomes and laboratory values will not be centrally adjudicated**

This is a large streamlined clinical trial with a primary focus on hard outcomes which are readily identifiable at participant interview (e.g. starting dialysis or receipt of a kidney transplant) and centrally measured creatinine. Each such report is to be approved by a Local Investigator.

Initiation of maintenance dialysis and receipt of a kidney transplant have simple definitions (see Section 0) and so assessments are mainly based on investigator-approved local reports. Assessments of all-cause hospitalization are similarly be based on LCC reports and are not centrally adjudicated. eGFR outcomes are purely based on laboratory values with the definition of sustained is provided in Section 1.2.2 above.

#### **1.3.2 Approach to clinical adjudication**

Confirmation of outcomes by a centrally based clinician reviewing additional information collected from LCCs will focus on a limited set of key clinical outcomes where there are complex diagnostic criteria (e.g. hospitalization with heart failure or cause-specific mortality).

The list of outcomes selected for adjudication is provided in Section 3.7 of the Protocol. All review, processing and adjudication of outcomes selected for clinical adjudication is assessed blinded to study treatment allocation (empagliflozin or placebo). The complete process is set out in SOP 9b: Adjudication Procedures (EDMS #6062). In brief, LCC clinical staff seek additional information about outcomes and adverse events initially reported as death, heart failure, and selected tertiary (myocardial infarction and stroke) and safety outcome events. Such information may include copies of clinical records, investigations or treatments.

Blinded clinicians based at, or overseen by, the Central Co-ordinating Office provide the final adjudication. These clinicians may include, but will not necessarily be nephrologists or cardiologists and work under the guidance of senior clinical trialists with extensive experience of adjudicating many

thousands of such events (including ESKD, cardiovascular events, and death) in previous large-scale trials in similar populations.

In making their final decisions, clinicians review the additional information collected from the LCCs as well as other potentially relevant information recorded during study Follow-up visits. SOP 9b: Adjudication Procedures details a quality control process where an initial random sample of about 10% of the first 100 events assessed by each adjudicator.

Similar approaches to outcome recording and clinical adjudication have been successfully deployed in previous large studies which have demonstrated efficacy or serious hazard of medications. These include:

- i. SHARP which demonstrated that, compared to placebo, allocation to simvastatin 20mg plus ezetimibe 10mg reduces major atherosclerotic events among patients with moderate-to-advanced CKD<sup>9</sup>; and
- ii. THRIVE which demonstrated that compared to placebo, allocation to extended-release niacin–laropiprant does not significantly reduce the risk of major vascular events, but does increase the risk of serious gastrointestinal, skin, bleeding and infection-related adverse events among people at high risk of cardiovascular disease.<sup>10</sup>
- iii. REVEAL which demonstrated that compared to placebo, allocation to anacetrapib 100mg reduces major coronary events in patients with prior cardiovascular disease.<sup>11</sup>

Clinical definitions of EMPA-KIDNEY primary, secondary and selected safety outcomes are provided below.

## 2 END-STAGE KIDNEY DISEASE

### 2.1 Definition

According to the Protocol, the definition of ESKD includes:

- i. Initiation of maintenance dialysis;
- ii. Receipt of a kidney transplant.

#### 2.1.1 Initiation of maintenance dialysis

At each scheduled follow-up appointment participants are asked about initiation of dialysis. When reporting dialysis, investigators are asked to provide the date dialysis started and:

- i. Confirm whether dialysis is ongoing or was temporary (and if only temporary, the reason for stopping). In general, ongoing dialysis is considered as maintenance dialysis if it is required for  $\geq 90$  days. Note that death within 90 days of starting dialysis is a special situation.<sup>a</sup>
- ii. Confirm the type of dialysis (peritoneal dialysis or haemodialysis).

#### 2.1.2 Receipt of a kidney transplant

At each scheduled follow-up appointment participants are asked about kidney transplantation. When reporting receipt of a kidney transplant, investigators are asked to confirm the date of the procedure.

See Section 1.2.2 for the definition of kidney disease progression based on measurement of eGFR and see Section 3.3.1 for the definition of a renal death.

---

<sup>a</sup> During adjudication of a death, a central clinician adjudicator may note the start of dialysis therapy. The adjudicator is required to provide an opinion on whether the dialysis would have been likely to be required long-term (i.e. renal recovery to be independent of dialysis is unlikely) or only temporarily (i.e. dialysis was started for acute kidney injury and recovery would have been expected had the participant not died within 90 days of starting dialysis).

### 3 DEATH

#### 3.1 Definition

- i. Review of all reports of death is required to adjudicate:
  - a. The date of death
  - b. The cause of death
- ii. Deaths are to be coded using MedDRA Preferred Terms. They are categorized to facilitate the protocol-specified analyses as follows:

| <b>Cardiovascular death</b>    |                                          |                                                                |
|--------------------------------|------------------------------------------|----------------------------------------------------------------|
| Cardiac                        | Coronary heart disease                   | Myocardial infarction                                          |
|                                |                                          | Other coronary heart disease                                   |
|                                | Other cardiac disease                    | Specific cardiac causes, including non-ischaemic heart failure |
|                                |                                          | Sudden cardiac death                                           |
| Stroke                         | Haemorrhagic                             |                                                                |
|                                | Ischaemic                                | Ischaemic stroke (+/- haemorrhagic transformation)             |
|                                | Undetermined                             |                                                                |
| Other cardiovascular           | Specific other causes (not listed above) | (e.g. pulmonary embolism, ruptured aortic aneurysm)            |
| Presumed cardiovascular        | Unexplained death                        |                                                                |
| <b>Noncardiovascular death</b> |                                          |                                                                |
| Medical                        | Renal                                    | Death due to CKD stage 5                                       |
|                                | Infection (incl. COVID-19)               |                                                                |
|                                | Cancer                                   |                                                                |
|                                | Other medical                            |                                                                |
| Non-medical                    | External                                 | Trauma                                                         |

#### 3.2 Cardiovascular deaths

Cardiovascular death includes deaths due to any of the following categories: cardiac, stroke, other cardiovascular and presumed cardiovascular (see table above).

##### 3.2.1 Myocardial infarction death

Death due to acute myocardial infarction (MI) refers to a death within 30 days after a MI related to consequences seen immediately after the MI, such as progressive congestive heart failure, inadequate cardiac output, or recalcitrant arrhythmia. This includes:

- i. Deaths due to either acute MI; and
- ii. Deaths due to surgical and non-surgical investigations and procedures to treat acute MI or a complication thereof.

Deaths occurring within 30 days after a MI should be attributed to MI unless there was a clear alternative cause.

### **3.2.1.1 Supporting evidence**

To confirm death from MI there should be evidence of myocardial necrosis plus at least one other piece of supporting information, and no other likely diagnosis:

#### **i. Evidence of myocardial necrosis from:**

- a. Raised cardiac biomarker results compatible with acute myocardial necrosis (after taking into consideration the potential effects of CKD on such biomarkers); or
- b. Autopsy with MI or coronary thrombus of an age consistent with the clinical presentation.

#### **ii. Other supporting information:**

- a. Relevant presentation:
  1. Symptoms of ischaemia; or
  2. Death
- b. ECG evidence of:
  1. New ischaemia; or
  2. Development of pathological Q waves
- c. Cardiac imaging demonstrating new myocardial defect or evidence of acute coronary occlusion.

### **3.2.2 Other coronary heart disease death**

Death due to other coronary disease includes cardiac causes of death that are believed related to coronary atherosclerosis. This includes:

- i. Deaths that are related to angina (e.g. death following admission with unstable angina), chronic ischaemia (including ischaemic cardiomyopathy), and late complications of MI (after 30 days);
- ii. Deaths due to surgical and non-surgical investigations and procedures for coronary artery disease (other than as treatments for acute MI); and
- iii. Deaths which are believed to be due to coronary atherosclerosis, with autopsy findings of coronary artery disease but without a lesion of an age corresponding to the clinical presentation.

In all cases, deaths due to MI as defined under 3.2.1 should be excluded.

### **3.2.3 Other cardiac disease death (including sudden cardiac death)**

Death due to other cardiac disease includes:

- i. Deaths that are likely to be due to specific cardiac disorders (e.g. valvular heart disease, non-ischaemic cardiomyopathy, primary arrhythmia); and
- ii. Deaths due to surgical and non-surgical investigations and procedures for other cardiac disease (other than for coronary artery disease);
- iii. Deaths that are sudden and believed likely to be due to cardiac disease, but no definite cardiac cause described above has been identified are sudden cardiac deaths (MedDRA Preferred Term: "Sudden cardiac death" [10049418]). These include witnessed sudden deaths with or without new or worsening of cardiac symptoms, and unwitnessed deaths in a participant who was seen to be alive and clinically well within 72 hours of being found

dead without any evidence of another cardiovascular or a non-cardiovascular cause.

Other cardiac death excludes deaths thought to be due to coronary heart disease (including MI). In some cases, there may be evidence of both coronary heart disease and other cardiac disease (e.g. coronary atherosclerosis in a patient with aortic stenosis). In such cases, the available evidence (e.g. clinical presentation, eye-witness reports, clinical investigations, autopsy findings) should be used to determine the pathology that most likely led to death.

#### **3.2.4 Stroke death**

Stroke is defined as an acute episode of focal or global neurological dysfunction caused by brain, spinal cord, or retinal vascular injury as a result of haemorrhage or infarction. Death due to stroke refers to a death which results from:

- i. An inexorable decline in the condition of the patient following stroke (typically, but not always within 30 days of the initial event); or
- ii. A complication of the stroke (e.g. infection, complication of intervention or procedure); or
- iii. Withdrawal of other therapies because of concerns relating to the poor prognosis associated with the stroke (e.g. withdrawal of dialysis).

Wherever possible, stroke subtype (e.g. haemorrhagic, ischaemic or undetermined) should be differentiated.

##### **3.2.4.1 Haemorrhagic stroke**

Haemorrhagic stroke is defined as a stroke caused by a non-traumatic intraparenchymal, intraventricular, or subarachnoid haemorrhage.

##### **3.2.4.2 Ischaemic stroke**

For the purposes of analysis, ischaemic stroke will include all of the following:

- i. Ischaemic stroke, which is defined as a stroke caused by an infarction of central nervous system tissue; or
- ii. Ischaemic stroke with haemorrhagic transformation, which is defined as ischaemic stroke with evidence of subsequent haemorrhage into an area of previous infarction.

##### **3.2.4.3 Undetermined stroke**

Undetermined stroke is defined as a stroke of unknown/unconfirmed pathological type, i.e. a stroke for which it is unclear whether there is an ischaemic or haemorrhagic cause because imaging was not performed or the result is not available.

##### **3.2.4.4 Exclusions**

The following conditions are not to be included in the definition of stroke:

- i. Severe prolonged hypoglycaemia resulting in neurological deficits;
- ii. Trauma;
- iii. Any subdural or extradural haematoma;
- iv. Findings on CT scans (done for any reason) that do not correlate with a clinical episode;

- v. Transient ischaemic attacks and related syndromes (with symptoms lasting <24 hours and not leading to death, unless there is clear evidence of new infarction on cranial imaging); and
- vi. Non-cardiovascular pathologies (e.g. tumour, degenerative disorders).

### **3.2.5 Other cardiovascular death**

Other cardiovascular death includes:

- i. Deaths due to other cardiovascular causes (e.g. pulmonary embolism, primary pulmonary hypertension, ruptured aortic aneurysm, limb ischaemia); and
- ii. Deaths due to surgical and non-surgical investigations and procedures for other cardiovascular disease (including peripheral arterial revascularization procedures such as peripheral bypass grafting, endarterectomy, arterectomy, embolectomy, and angioplasty).

### **3.2.6 Unexplained death**

- i. Deaths for which no cause can be determined in a CKD population are often from cardiovascular causes, and are to be considered presumed cardiovascular deaths.<sup>b</sup>
- ii. Deaths which are unexplained are those with no evidence of an alternative cardiovascular or non-cardiovascular cause of death (excluding sudden cardiac death – see Section 3.2.3). This would include deaths for which the cause of death is medically unclear (despite adequate supporting documentation) as well as those for which there is inadequate documentation (despite best efforts). [For example, a death for which there is no information beyond “found dead at home” or “patient died”, despite efforts to obtain further details (e.g. medical records, witness report) may be adjudicated as unexplained death.]

### **3.3 Noncardiovascular death**

Noncardiovascular death includes deaths due to any of the following categories: renal, infection, cancer, other medical and non-medical (see table in Section 3.1 for more details). Discussion with a Principal Investigator is encouraged for difficult cases. This may be particularly important if there is uncertainty as to whether a cardiovascular or a non-cardiovascular disease was the predominant cause of death.

#### **3.3.1 Renal death**

Evidence of renal death requires:

- i. Evidence of CKD stage 5 (i.e. eGFR <15 mL/min/1.73m<sup>2</sup> [and usually <10 mL/min/1.73m<sup>2</sup>] or ESKD); AND
- ii. Evidence of:
  - a. Conservative management of ESKD: the patient or their representatives had decided that, despite a clinical need, renal replacement therapy [RRT] was not to be provided. This includes progression to ESKD before RRT can be provided; OR

---

<sup>b</sup> As recommended by Standardized Data Collection for Cardiovascular Trials Initiative (SCTI) Cardiovascular and Stroke Endpoint Definitions for Clinical Trials.

- b. Withdrawal from RRT: the patient or their representative has chosen to discontinue RRT (e.g. personal choice, intolerant of dialysis therapy);  
AND

No evidence that other major pathology led: (a) to death, or (b) to the decision to withdraw from RRT (e.g. cancer or stroke), or (c) made dialysis infeasible. Such deaths should be ascribed to the underlying condition.

### 3.3.2 Infection death

- i. Infection should be coded as the cause of death if:
  - death results directly from the infection;
  - death results from a complication of the infection (e.g. acute kidney injury).
- ii. Infection should not be coded as the cause of death if the criteria for renal death, cancer death or any type of cardiovascular death are met (e.g. death resulting from pneumonia occurring 2 weeks after a stroke would be coded as a stroke death).

### 3.3.3 Cancer death

The underlying cause of cancer should be coded as the cause of death if death results:

- Directly from the cancer; or
- From a complication of the cancer or its treatment (e.g. infection / surgery / chemotherapy / radiotherapy); or
- From withdrawal of other therapies (including dialysis) because of concerns relating to the poor prognosis associated with the cancer.

Cancer causes of death are to be categorized by site (e.g. primary organ of origin). Cancer deaths may arise from cancers that were present prior to randomization or which developed subsequently. These two scenarios are to be distinguished in the adjudication process, but if this distinction is not possible (e.g. due to lack of sufficiently detailed documentation) then the cancer will be assumed to have developed after randomization.

### 3.3.4 Other specific medical causes of death

- i. The available evidence should be used to determine the most likely cause of death.
- ii. Other medical causes of death should not be coded as the cause of death if the criteria for renal death, infection death, cancer death or any type of cardiovascular death are met.
- iii. Acute kidney injury, ketoacidosis and liver causes of death should be adjudicated in line with the specific safety outcome definitions (see Section 5)
- iv. Deaths due to surgical and non-surgical investigations and procedures for non-vascular diseases (e.g. bowel resection for Crohn's disease) should be attributed to the underlying disease for which the investigation or procedure was carried out.

### 3.3.5 Non-medical death

Non-medical death is defined as any death that is thought to be due to a non-medical ("external") cause. Not only are such deaths uncommon in most clinical



trials, but they are generally unlikely to be affected by study treatments. Examples include suicide, homicide, road traffic accident, house fire, electrocution, war and natural disaster.

## **4 HOSPITALIZATION FOR HEART FAILURE**

### **4.1 Definition**

Hospitalization for heart failure is part of a composite key secondary outcome, combined with cardiovascular death. To confirm hospitalization for heart failure all of the following should generally be true:

- i. Admission to inpatient care and staying at least one night in hospital;
- ii. New or worsening symptoms of heart failure as a primary reason for hospitalization;
- iii. Evidence of heart failure on examination or investigation;
- iv. Treatment for heart failure during the admission.

Note: There should not be evidence that another non-cardiac diagnosis was the primary cause of hospitalization and symptoms. These other diagnoses include other specific cardiovascular disorders (e.g. primary pulmonary hypertension or pulmonary embolism), or non-cardiac diseases (e.g. chronic obstructive pulmonary disease, liver failure, severe anaemia, or fluid overload in an ESKD patient resulting from insufficient dialysis).

### **4.2 Supporting evidence**

#### **4.2.1 Admission to inpatient care and staying at least one night in hospital**

Evidence is required that a hospital discharge is at least one calendar day after admission.

#### **4.2.2 New or worsening symptoms of heart failure**

Evidence that heart failure is a primary cause of admission is required with presentations including:

- i. New or worsening shortness of breath on exertion, lying down or paroxysmally at night; or
- ii. Reduced exercise tolerance; or
- iii. Increased fatigue; or
- iv. Other symptoms which are considered to be caused by worsened end-organ perfusion such as dizziness, mental confusion or volume overload such as weight gain or lower extremity swelling.

#### **4.2.3 Evidence of heart failure on physical examination or on investigations**

Evidence of new or worsening of at least two physical examination findings; or of at least one physical examination finding and at least one investigational finding is required:

- i. Examination findings:
  - a. Pulmonary congestion, including bibasal inspiratory crepitations and/or pleural effusions;
  - b. Peripheral oedema;
  - c. Raised jugular venous pressure;
  - d. Ascites (without primary liver disease);
  - e. Rapid weight gain due to fluid retention;
  - f. Gallop rhythm;

- g. Cardiogenic shock (which is usually defined as a systolic blood pressure of <90 mmHg which is usually unresponsive to fluid resuscitation or heart rate correction and responds promptly to inotropic support).
- ii. Investigational findings:
  - a. Echocardiographic changes confirming heart failure;
  - b. Radiological evidence of pulmonary congestion and/or pleural effusions;
  - c. Increased B-type natriuretic peptide (BNP)/ N-terminal pro-BNP (NT-proBNP) concentrations consistent with decompensation of heart failure (such as BNP > 500 pg/mL or NT-proBNP > 2,000 pg/mL). Note that in patients who might be expected to have chronically elevated natriuretic peptides (e.g. patients with a decreased eGFR or with chronic heart failure), a significant increase should be noted above a presumed or known historical level;
  - d. Cardiac catheterization measurements confirming ventricular dysfunction.

#### **4.2.4 Treatment for heart failure during the admission**

Evidence is required of at least one of the following:

- i. Initiation of new or substantial escalation of current diuretic therapy or vasodilators;
- ii. Initiation of intravenous therapy, including diuretics, vasodilators or inotropic support (including vasopressors);
- iii. Use of mechanical fluid removal such as ultrafiltration;
- iv. Other methods to improve cardiac function, such as pacing, intra-aortic balloon pump, cardiac transplantation, etc.

## 5 SAFETY OUTCOMES

### 5.1 *Ketoacidosis*

Non-ketotic raised anion-gap metabolic acidosis is common in advanced CKD. To clinically adjudicate and confirm ketoacidosis, evidence of all of the following criteria is generally required to confirm the occurrence of a ketoacidosis and distinguish it from renal acidosis:

- i. Symptoms or relevant presentation (e.g. new confusion or drowsiness, dehydration, nausea/vomiting, abdominal pain, Kussmaul breathing, etc.) or relevant triggers, including missed insulin doses or intercurrent illness; AND
- ii. Evidence of metabolic acidosis (i.e. serum bicarbonate levels <15 mmol/L); AND
- iii. Evidence of ketones in blood or urine. A blood beta-hydroxybutyrate level exceeding 1.5 mmol/L or urine ketones of at least

A raised blood glucose/sugar level is not required in the definition of ketoacidosis as “euglycaemic” presentations are reported in people taking SGLT-2 inhibitors.

### 5.2 *Lower limb amputation*

- i. Amputation is defined as resection of a limb through a bone, resection of a limb through a joint (i.e. disarticulation) and any auto-amputations (i.e. spontaneous separation of non-viable portion of the lower limb such as a digit).
- ii. Debridement (removal of callus or dead tissue), procedures on an amputation stump (e.g. revision, drainage of an abscess, etc.) and traumatic amputation of a viable limb (or part thereof) are not considered amputation.

For each separately reported lower limb amputation, adjudicators should have sufficient evidence to confirm fact, date and level of amputation (e.g. toe, trans-metatarsal, ankle, below knee or above knee). Additionally, the presence of the following conditions preceding amputation will be recorded wherever mentioned in clinical notes: diagnosis or treatment for peripheral arterial disease, presence of peripheral neuropathy, recent diabetic foot ulceration, and recent lower limb infection or gangrene.

### 5.3 *Acute kidney injury*

Confirmation of acute kidney injury requires evidence of one of the following:

- i. An increase in serum creatinine to 1.5-times a recent historical value (which is presumed to have increased within about a week); OR
- ii. Initiation of RRT for acute kidney injury

At every scheduled Follow-Up visit, participants are asked about serious acute kidney injury (i.e. asked if they have been admitted to hospital because of a sudden change in their kidney function). Non-serious acute kidney injury should not be recorded, with the exception of when it results in study treatment discontinuation.

Participants also provide a blood sample for local analysis of creatinine at each scheduled Follow-up visit. Central study clinicians are trained to initiate contact

with the LCC clinical staff if there is a  $\geq 50\%$  increase in creatinine since the preceding Follow-up visit. Such increases need to be reported as adverse events if they result in hospitalization (or any of the other seriousness criteria are met) or lead to study treatment discontinuation.

All serious adverse events reported as acute kidney injury (or equivalent terms) are selected for clinical adjudication. Wherever possible, for each confirmed acute kidney injury event, the acute kidney injury stage (see below) and a single primary aetiology (pre-renal, renal, obstructive or unknown) are to be ascribed:

| Acute kidney injury stage | Serum creatinine increase                                  |
|---------------------------|------------------------------------------------------------|
| 1                         | $\geq 1.5$ , $< 2.0$ -times historical value(s)            |
| 2                         | $\geq 2.0$ , $< 3.0$ -times historical value(s)            |
| 3                         | $\geq 3.0$ -times historical value(s) or initiation of RRT |

Note: Adapted from 2012 KDIGO Acute Kidney Injury staging guidance. Increase in serum creatinine of  $\geq 27 \mu\text{mol/L}$  (or  $\geq 0.3 \text{ mg/dL}$ ) within about 48 hours has been excluded from the definition of stage 1 as this is likely to occur simply due to natural variation in these participants with advanced CKD. Similarly, serum creatinine  $\geq 353.6 \mu\text{mol/L}$  (or  $\geq 4.0 \text{ mg/dl}$ ) has been excluded from the definition of stage 3 as this may be less than their historical measurement(s).

#### 5.4 **Serious genital infections, including Fournier's gangrene**

- i. A genital infection is any bacterial or fungal infection of the genitals or perineum, including vulvovaginitis, balanitis and infections of skin between the genital and anus.
- ii. Necrotising fasciitis of the perineum (Fournier's gangrene) is a subset of all serious genital infections characterized by fulminant tissue destruction which may extend from a cellulitis to include fasciitis and myositis. In men, in which it is more common, it can affect the scrotum and penis. In both sexes, it can rapidly spread to involve the anterior abdominal wall and gluteal muscles.
- iii. Necrotising fasciitis of the perineum is characterized by:
  - a. Perineal inflammation (erythema and oedema) with or without evidence of necrosis, severe pain (out of proportion to examination findings), and crepitus or bullous changes (indicating gas gangrene, evident in perhaps a half of cases);
  - b. Systemic features of infection;
  - c. A need for rapid surgical debridement and intravenous antibiotics; and
  - d. Histopathological evidence of extensive tissue destruction, inflammation with abundant bacteria along fascial planes and sometimes necrotising myositis.

To confirm a diagnosis of necrotising fasciitis of the perineum generally requires evidence of three of the four features listed above, and is specifically coded to differentiate it from other serious genital infections. Note that necrotising fasciitis of the lower limb and infections developing from primary ano-rectal disease are not considered a serious genital infection.

#### 5.5 **Liver-related outcomes**

Serious liver disease is defined biochemically as alanine aminotransferase (ALT) or aspartate aminotransferase (AST)  $\geq 5x$  Upper Limit of Normal (ULN) or the combination of ALT or AST  $\geq 3x$  ULN with bilirubin  $\geq 2x$  ULN measured in

the same blood sample at study follow-up or early recall visits. For each confirmed case of liver injury, an associated primary aetiology based on the most probable cause will be ascribed. Possible aetiologies include infections (e.g. hepatitis virus), alcohol, shock liver (e.g. severe hypotension/sepsis), drug hepatotoxicity (and the most likely causal medication, which may be study treatment, will be recorded), liver congestion, non-alcoholic fatty liver, autoimmune hepatitis, metabolic disorders, other or unknown.

## **5.6 Fractures**

- i. A fracture is defined as a broken bone.
- ii. Fracture reports will not be clinically adjudicated. Instead information on the site and aetiology will be recorded at the time of each fracture report.
- iii. Aetiology is selected from one of the following at the time of reporting:

- 
- High Trauma: fractures resulting from severe trauma such as motor vehicle crashes, being struck by a vehicle or other fast-moving projectile, or falls from greater than standing height (e.g. falls off a ladder or other raised surface, not including stairs)
  - Low Trauma: fractures due to falls from standing height or less; falls on stairs, steps, or curbs; moderate trauma other than a fall (e.g. collisions with objects during normal activities); and minimal trauma other than a fall (e.g. turning over in bed)
  - Pathological: fractures occurring in an area that is weakened by another disease process such as a tumour, metastatic cancer of the bone, infection, inherited bone disorders, etc.
  - Stress: identifiable fractures caused by repetitive stress
  - Other: fractures that cannot be attributable to the aetiological definitions above.
-

## 6 REFERENCES

1. Standardized Data Collection for Cardiovascular Trials Initiative (SCTI). Standardized Definitions for Cardiovascular and Stroke Endpoint Definitions for Clinical Trials. <https://www.cdisc.org/standards/therapeutic-areas/cardiovascular/cardiovascular-studies-therapeutic-area-user-guide-v10> (Accessed 28th December 2017).
2. Eapen ZJ, Lauer MS, Temple RJ. The imperative of overcoming barriers to the conduct of large, simple trials. *JAMA* 2014; **311**(14): 1397-8.
3. Baigent C, Herrington WG, Coresh J, et al. Challenges in conducting clinical trials in nephrology: conclusions from a Kidney Disease-Improving Global Outcomes (KDIGO) Controversies Conference. *Kidney Int* 2017; **92**(2): 297-305.
4. Ndounga Diakou LA, Trinquart L, Hrobjartsson A, et al. Comparison of central adjudication of outcomes and onsite outcome assessment on treatment effect estimates. *Cochrane Database Syst Rev* 2016; **3**: MR000043.
5. Meeker-O'Connell A, Glessner C, Behm M, et al. Enhancing clinical evidence by proactively building quality into clinical trials. *Clinical trials* 2016; **13**(4): 439-44.
6. US FDA. Guidance for Industry. Oversight of Clinical Investigations — A Risk-Based Approach to Monitoring. <http://www.fda.gov/downloads/Drugs/.../Guidances/UCM269919.pdf> (accessed 28th December 2017).
7. Collins R, Reith C, Emberson J, et al. Interpretation of the evidence for the efficacy and safety of statin therapy. *Lancet* 2016; **388**(10059): 2532-61.
8. Levey AS, Stevens LA, Schmid CH, et al. A new equation to estimate glomerular filtration rate. *Ann Intern Med* 2009; **150**(9): 604-12.
9. Baigent C, Landray MJ, Reith C, et al. The effects of lowering LDL cholesterol with simvastatin plus ezetimibe in patients with chronic kidney disease (Study of Heart and Renal Protection): a randomised placebo-controlled trial. *Lancet* 2011; **377**(9784): 2181-92.
10. Landray MJ, Haynes R, Hopewell JC, et al. Effects of extended-release niacin with laropiprant in high-risk patients. *N Engl J Med* 2014; **371**(3): 203-12.
11. Bowman L, Hopewell JC, Chen F, et al. Effects of Anacetrapib in Patients with Atherosclerotic Vascular Disease. *N Engl J Med* 2017; **377**(13): 1217-27.

## Supplementary Methods

### Trial Adaptations due to Coronavirus-2019 Disease (COVID-19)

In 2020, EMPA-KIDNEY screening visits were temporarily stopped when regions/sites were particularly affected by the COVID-19 pandemic. The run-in window was temporarily extended to 6–15 weeks, where required. Follow-up of randomized participants unable to attend the study clinic remained possible using telephone follow-up and study treatment could be delivered by courier. Central sample collection was requested once in-person clinic visits were able to restart. Retrospective entries of any local measurements of creatinine were sought where central samples were missing.

### Laboratory Methods

Samples were processed and frozen at local sites before transfer to the Central Laboratories. Non-China samples were all analysed in Oxford. In Oxford, serum enzymatic creatinine was assayed using Beckman-Coulter AU680 clinical chemistry analysers and creatinine and albumin in urine were assayed using Beckman-Coulter DxC700 clinical chemistry analysers. Serum and urine assays used manufacturers' reagents, calibrators and settings (Beckman-Coulter, UK). Glomerular filtration rate was estimated using the CKD-EPI formula.<sup>1</sup> Glycated hemoglobin (HbA<sub>1c</sub>) analysis was performed by HPLC using ethylenediaminetetraacetic acid (EDTA) blood on an Arkray HA8180 analyser and reagents with a calibrator supplied by Menarini Diagnostics UK traceable to International Federation of Clinical Chemistry (IFCC) reference standards. N-terminal pro B-type natriuretic peptide (NT-proBNP) analysis was performed using Roche Cobas e601 system and manufacturers' reagents, calibrators and settings (Roche Diagnostics Ltd, UK). The Central Laboratory in Oxford is a UKAS-accredited testing laboratory, No. 2799 and with the exception of NT-proBNP, all assays are on scope of the Central Laboratory's accreditation.

The analysis for Chinese samples was performed by WuxiApptec in Shanghai, China with quality oversight by the Central Laboratory in Oxford. The Wuxi-Apptec Laboratory is a participant in the National Center for Clinical Laboratories External Quality Assessment (EQA) scheme and proficiency testing activities for serum and urine analytes. With the exception of HbA<sub>1c</sub>, WuxiApptec used the same methods as the central laboratory. HbA<sub>1c</sub> analysis on Chinese samples was performed using a Tosoh HLC-723G8 analyser and reagents with a calibrator supplied by Tosoh traceable to National Glycohemoglobin Standardization Program (NGSP) reference standards. A conversion factor was applied to convert results to IFCC;  $NGSP = [0.09148 * IFCC] + 2.152$ .

---

<sup>1</sup> Levey AS, Stevens LA, Schmid CH, et al. A new equation to estimate glomerular filtration rate. *Ann Intern Med* 2009;150(9):604-12. (In eng). DOI: 10.7326/0003-4819-150-9-200905050-00006.



## Supplementary Statistical Methods

**Joint frailty models for analyses for all-cause hospitalization**

The hazard ratio for the effect of allocation to empagliflozin versus placebo on all-cause hospitalizations (including first and subsequent hospitalizations) was estimated using a semi-parametric joint frailty model.<sup>2</sup> This approach accounts for the competing risk of death by jointly modelling: (a) the hazard function for all-cause hospitalizations conditional on the patient specific random frailty term; and (b) the hazard function for time to death conditional on the patient-specific random frailty term. To improve expected precision around effect size estimates, the model was adjusted for sex, prior diabetes and region (in the same categories used in the minimization process) as well as for age, estimated glomerular filtration rate (GFR) and log-transformed urinary albumin-to-creatinine ratio (ACR), each as continuous variables. Adjustment for baseline predictors as continuous variables where possible was done to improve expected convergence of the models.

**Shared parameter models for analyses of estimated GFR over time**

Mean annual rates of change in estimated GFR from baseline to the final follow-up visit (“total slopes”), and from 2 months to the final follow-up visit (“chronic slopes”) by treatment allocation were estimated using shared parameter models<sup>3</sup> adjusted for age, sex, prior diabetes, urinary ACR, and region (all in the categories used in the minimization process). Models estimating chronic slope were additionally adjusted for baseline estimated GFR (as a continuous variable) and the interaction between baseline estimated GFR and follow-up time. This approach jointly models: (a) the annual rate of change in estimated GFR using a linear mixed model (with random effects for each patient’s slope and intercept); and (b) the time to event for end-stage kidney disease (ESKD) or death (using a Weibull survival model in which the scale parameter is assumed to be linearly related to the random effects from the linear mixed model).

Specifically, the linear mixed model component is

$$Y_{ij} = (\beta_0 + u_{0i}) + \beta_1 X_i + (\beta_2 + u_{1i})t_{ij} + \beta_3 X_i t_{ij} + e_{ij}$$

and the Weibull model for time to ESKD or death has hazard function

$$h(t_{ij}) = \gamma \exp(\varphi + \eta_0 u_{0i} + \eta_1 u_{1i} + \alpha X_i)^\gamma t_{ij}^{\gamma-1}$$

where  $t_{ij}$  is the time (in years) of visit  $j$  for patient  $i$ ,  $Y_{ij}$  is the observed value of estimated GFR at visit  $j$  for patient  $i$ ,  $X_i$  is the treatment allocation for patient  $i$ ,  $\beta_0$  is the mean estimated GFR at baseline in the placebo arm,  $\beta_1$  is the mean difference in baseline estimated GFR between treatment allocations,  $\beta_2$  is the mean estimated GFR slope in the placebo arm, and  $\beta_3$  is the mean difference in estimated GFR slopes between treatment allocations.  $u_{1i}$  and  $u_{0i}$  are the random effects for each patient’s slope and intercept respectively, which are assumed to be independent multivariate normal random vectors with mean 0 and an unstructured covariance matrix.  $e_{ij}$  is the random error at time  $t_{ij}$ , which are assumed to be independent and normally distributed with mean zero and constant variance.

<sup>2</sup> Rogers JK, Yaroshinsky A, Pocock SJ, Stokar D, Pogoda J. Analysis of recurrent events with an associated informative dropout time: Application of the joint frailty model. *Statistics in Medicine* 2016; **35**(13): 2195-205.

<sup>3</sup> Vonesh EF, Greene T, Schluchter MD. Shared parameter models for the joint analysis of longitudinal data and event times. *Statistics in Medicine* 2006; **25**(1): 143-63.

Analyses used all available central laboratory estimated GFR measurements prior to the development of ESKD. The advantage of the above modelling approach (over a standard linear mixed model) is that it additionally allows for the dependence between the annual rate of change in estimated GFR and the time to ESKD or death (which is important because those with faster rates of change in estimated GFR will generally have a shorter time to ESKD or death). The mean slopes provided by the shared parameter model (total or chronic) may be thought of as the average of the patient-specific slopes, conditional on the baseline covariates in the model, and in the hypothetical scenario where estimated GFR had continued to be measured beyond the time of ESKD or death. As with other methods, the estimates they provide merely reflect averages over the follow-up period of interest (and hence, in the context of a drug which has an initial acute effect, the “total slope” requires careful interpretation).

#### **Mixed model repeated measures (MMRM)**

Linear mixed model repeated measures (MMRM) analyses were used to estimate mean estimated GFR by treatment allocation at each scheduled follow-up visit (and these values are shown in Figure 3). These models were adjusted for baseline estimated GFR (as a continuous variable), age, sex, prior diabetes, urinary ACR, and region (all in the same categories used in the minimization process), treatment allocation, follow-up time point and the interaction between baseline estimated GFR and follow-up time point. A further interaction term between treatment allocation and follow-up time point was then included in order to enable separate estimation of mean estimated GFR at each follow-up time point for each treatment arm, conditional on the other factors in the model. These models assume that any missing estimated GFR values can be predicted by the non-missing estimated GFR data for other individuals together with the other covariates in the model (i.e. that they are ‘missing at random’). A similar approach was used for analyses of physical and laboratory measurements.

## Supplementary Figures

Figure S1. CONSORT Flow Diagram

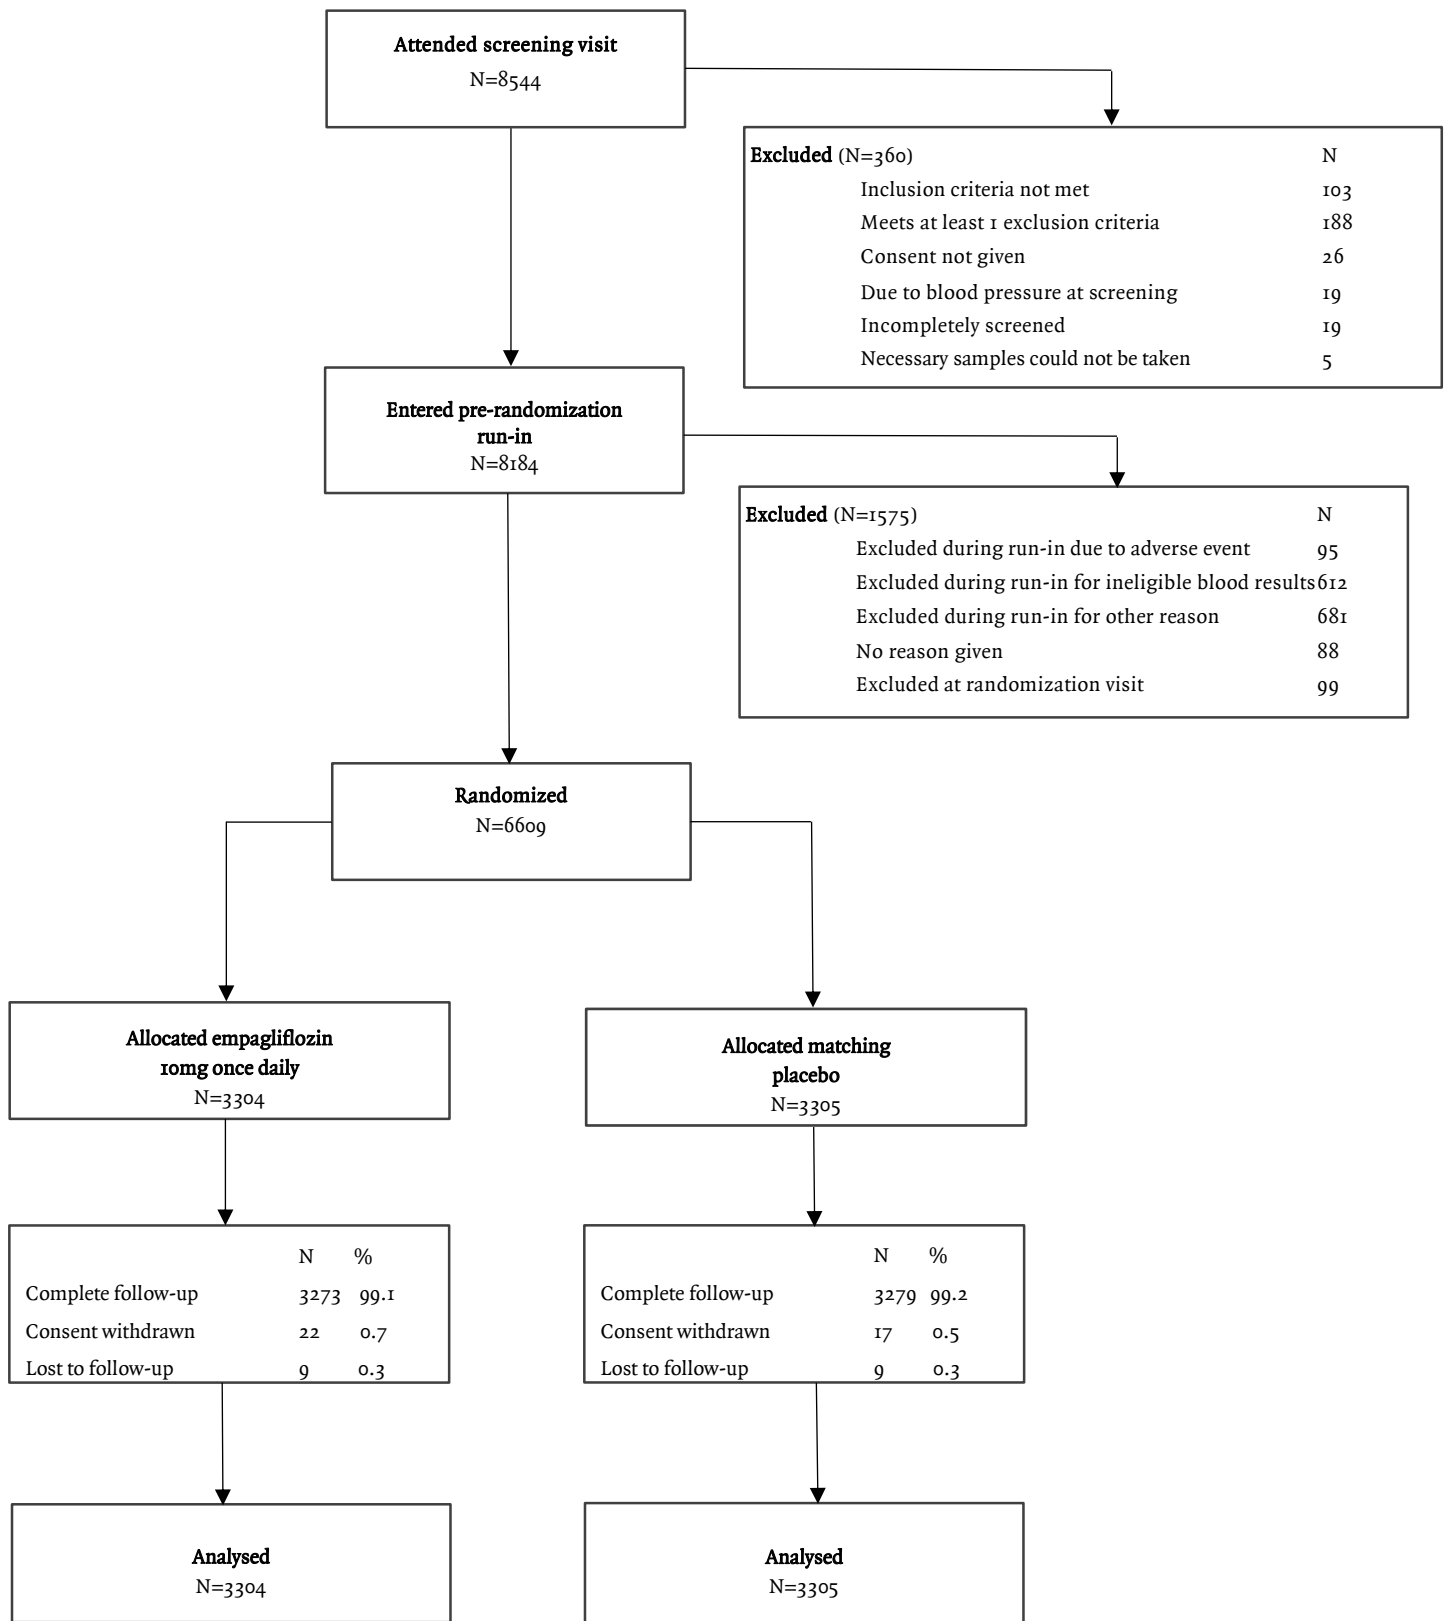

Complete follow-up defined as death before April 01, 2022 (start of final follow-up window) or completed final follow-up with last known alive after April 01, 2022. More details of reasons for exclusion are provided in: EMPA-KIDNEY Collaborative Group. Design, recruitment, and baseline characteristics of the EMPA-KIDNEY trial. *Nephrology Dialysis Transplantation* 2022;37(7):1317-29.

Figure S2a. Kidney Disease Progression

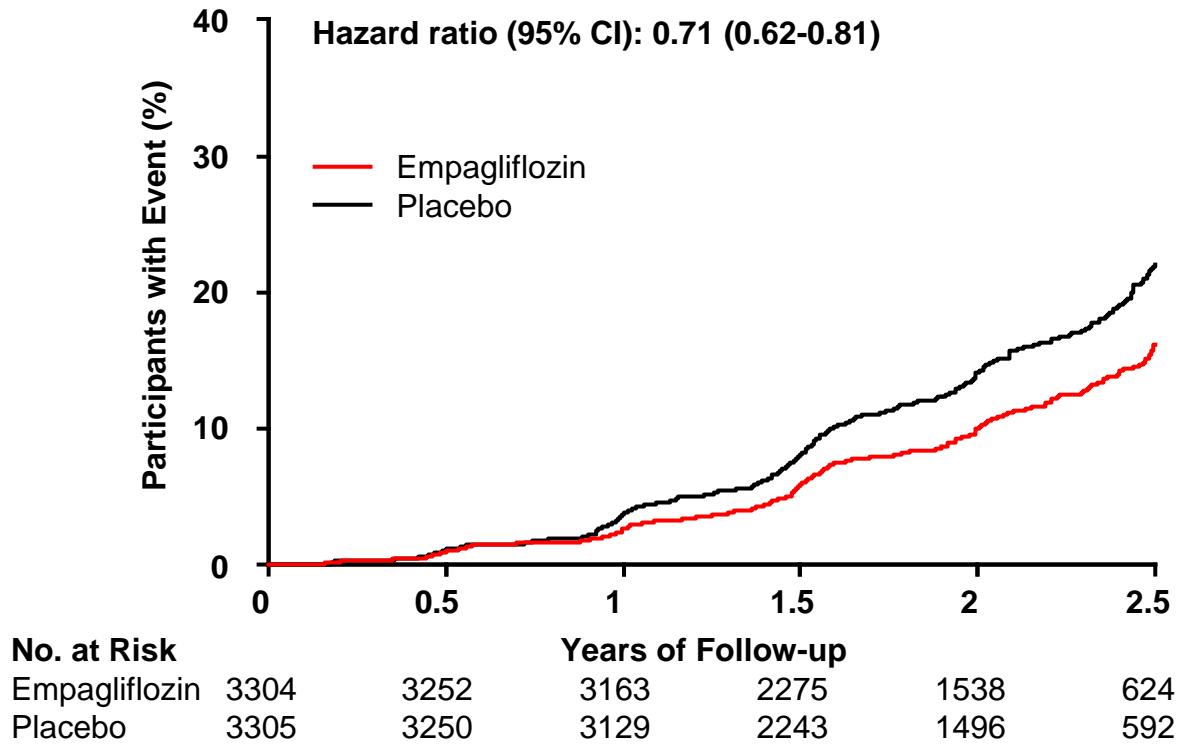

Kidney disease progression (end-stage kidney disease [maintenance dialysis or kidney transplant; sustained decline in estimated GFR to <10 ml per minute per 1.73 m<sup>2</sup>; sustained decline in estimated GFR of ≥40% from randomization] or renal death) occurred in 384 participants (11.6%) in the empagliflozin group and 504 participants (15.2%) in the placebo group.

Figure S2b. Death from Cardiovascular Causes

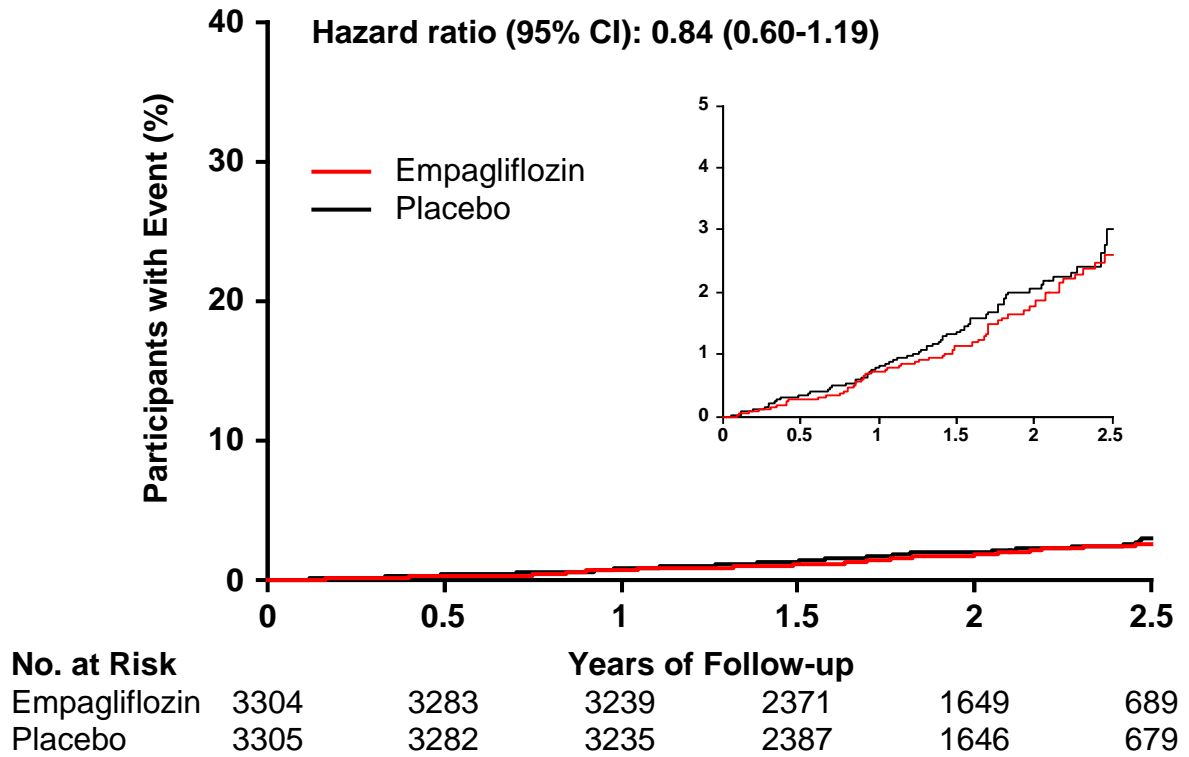

Death from cardiovascular causes occurred in 59 participants (1.8%) in the empagliflozin group and 69 participants (2.1%) in the placebo group.

Figure S3. Death by Cause

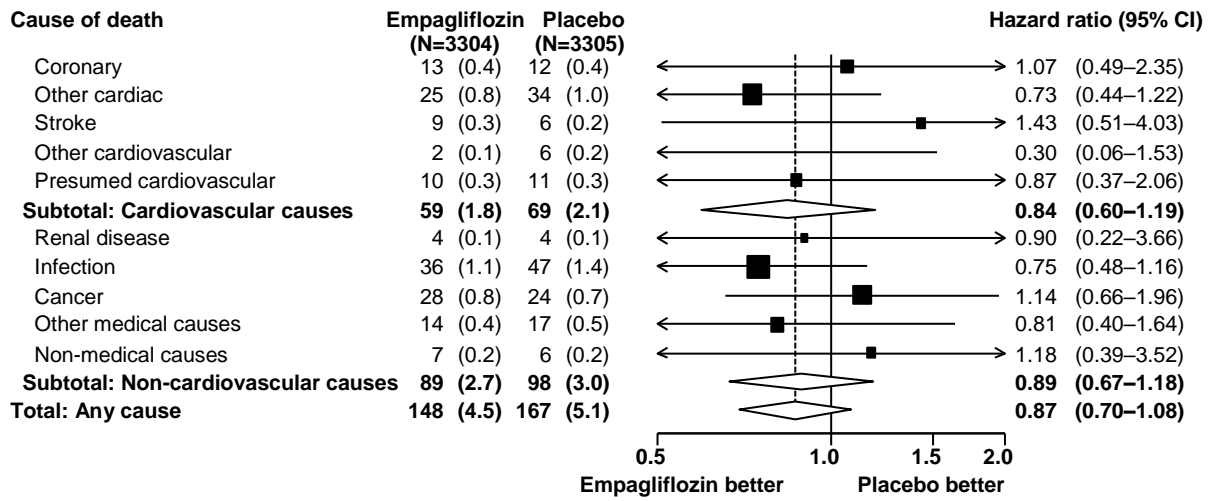

Shown are forest plots of the hazard ratios for different causes of death (with the diamonds representing subtotals and total rows). Hazard ratios and confidence intervals were estimated with the use of Cox proportional hazards regression models, adjusted for age, sex, prior diabetes, estimated glomerular filtration rate, urinary albumin-to-creatinine ratio, and region.

Figure S4. Primary Outcome by Key and Other Prespecified Subgroups

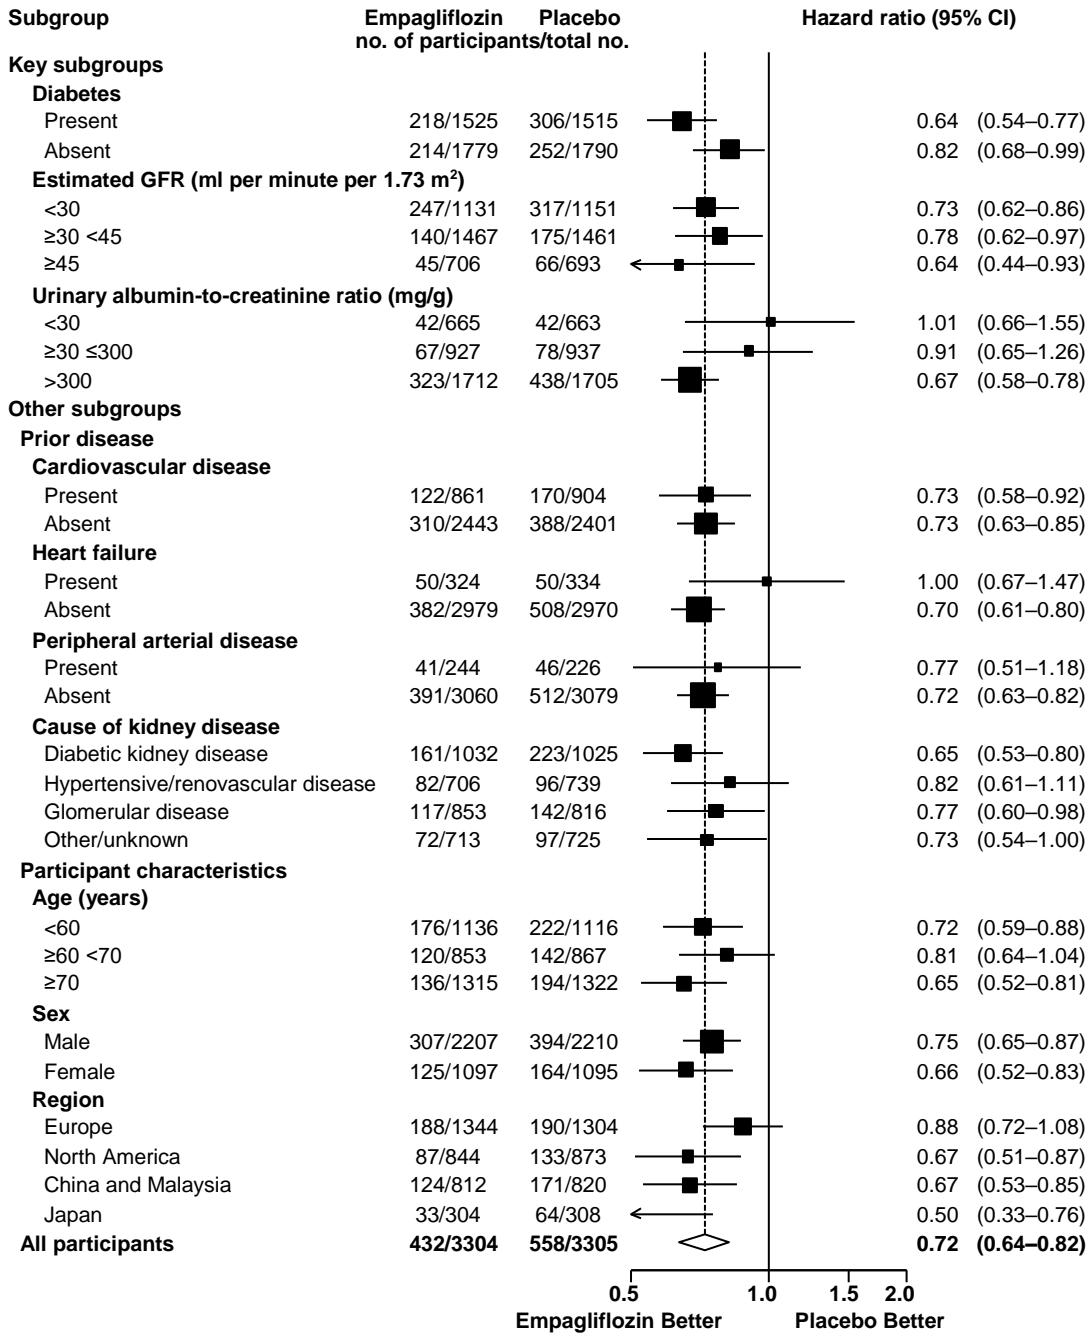

Continued on next page



Figure S4. Primary Outcome by Key and Other Prespecified Subgroups (continued)

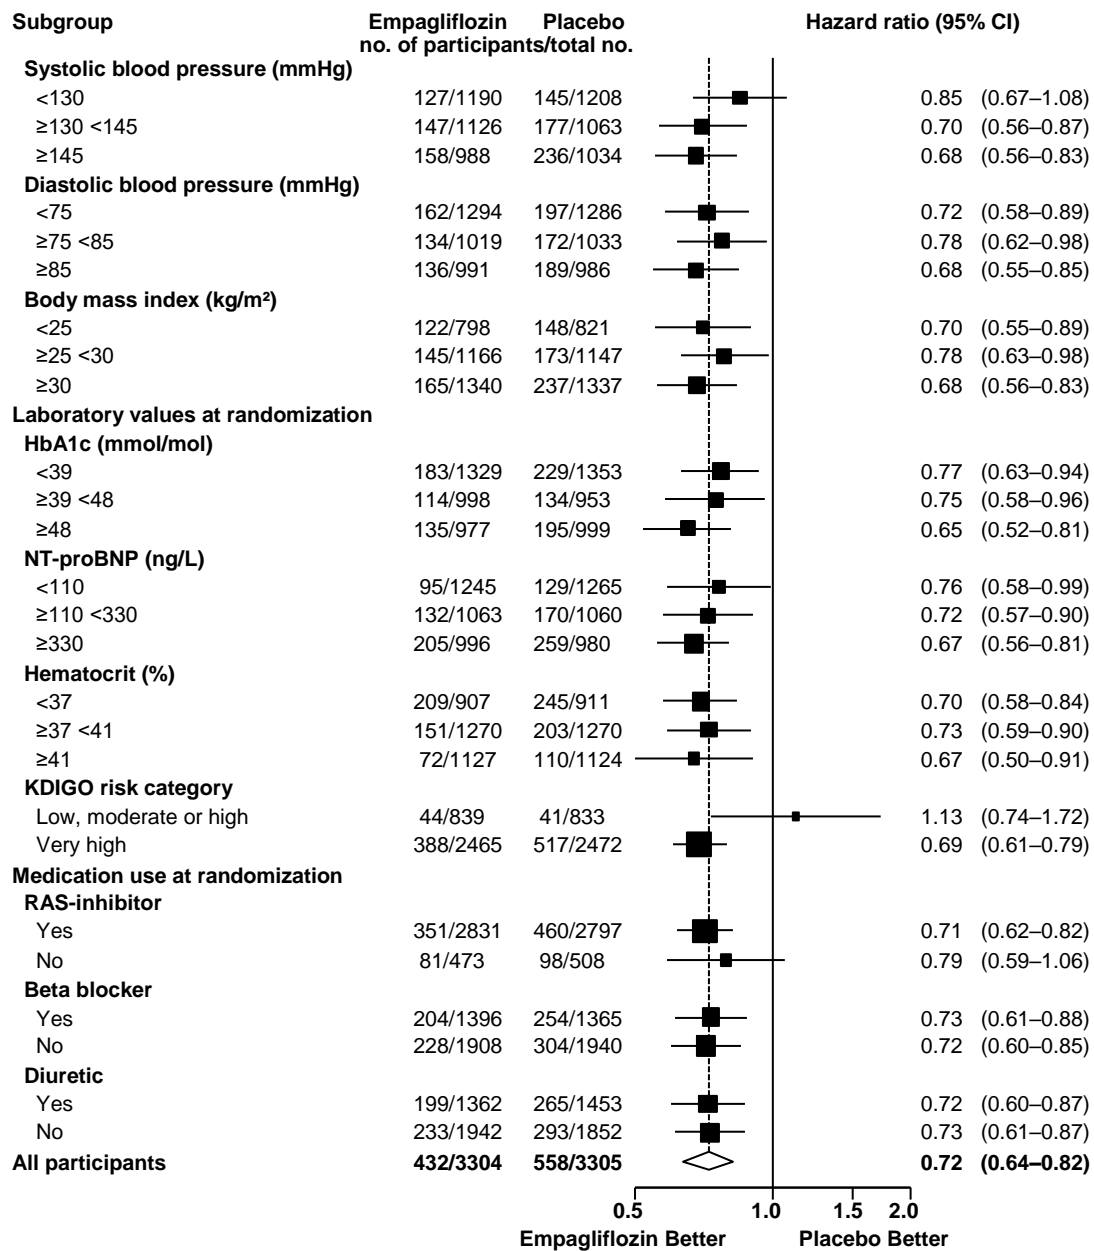

Shown are forest plots of the hazard ratios for the primary outcome according to key and other prespecified baseline subgroups. Hazard ratios and confidence intervals were estimated with the use of Cox proportional hazards regression models, adjusted for age, sex, prior diabetes, estimated GFR, urinary albumin-to-creatinine ratio, and region. Abbreviations: GFR = glomerular filtration rate; HbA1c = glycated hemoglobin; NT-proBNP = N-terminal pro B-type natriuretic peptide; KDIGO = Kidney Disease: Improving Global Outcomes; RAS = renin-angiotensin system.

Figure S5. Kidney Disease Progression by Key Prespecified Subgroups (Prespecified Exploratory Outcome)

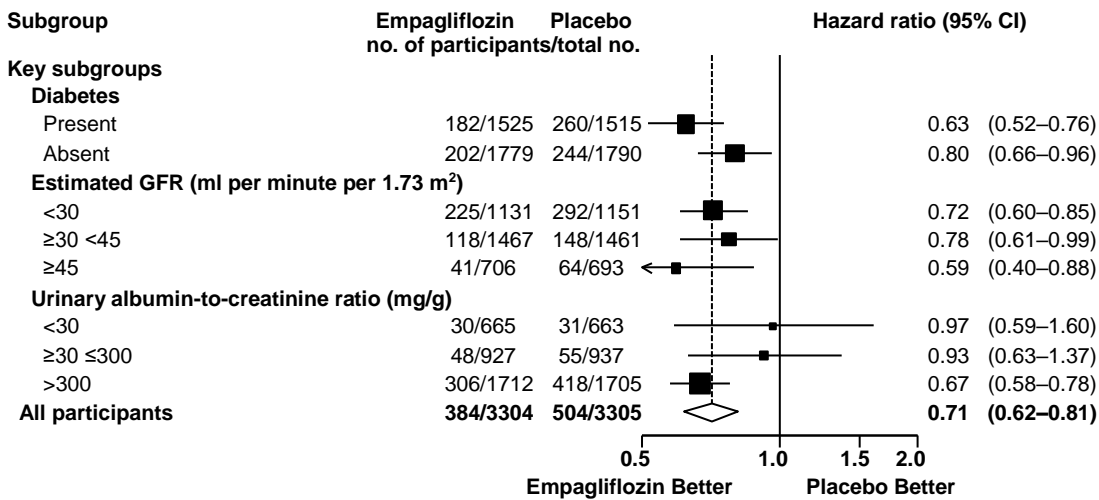

Shown are forest plots of the hazard ratios for the other secondary outcome of kidney disease progression according to key prespecified baseline subgroups (with the diamond representing the overall result). Hazard ratios, confidence intervals, and p values were estimated with the use of Cox proportional-hazards regression models, adjusted for age, sex, prior diabetes, estimated GFR, urinary albumin-to-creatinine ratio, and region. Tests for heterogeneity or trend in the hazard ratio for subgroups were estimated through the inclusion of relevant interaction terms. GFR = glomerular filtration rate.

Figure S6. Comparison of Estimated Chronic Slope with Mean Observed Estimated Glomerular Filtration Rate

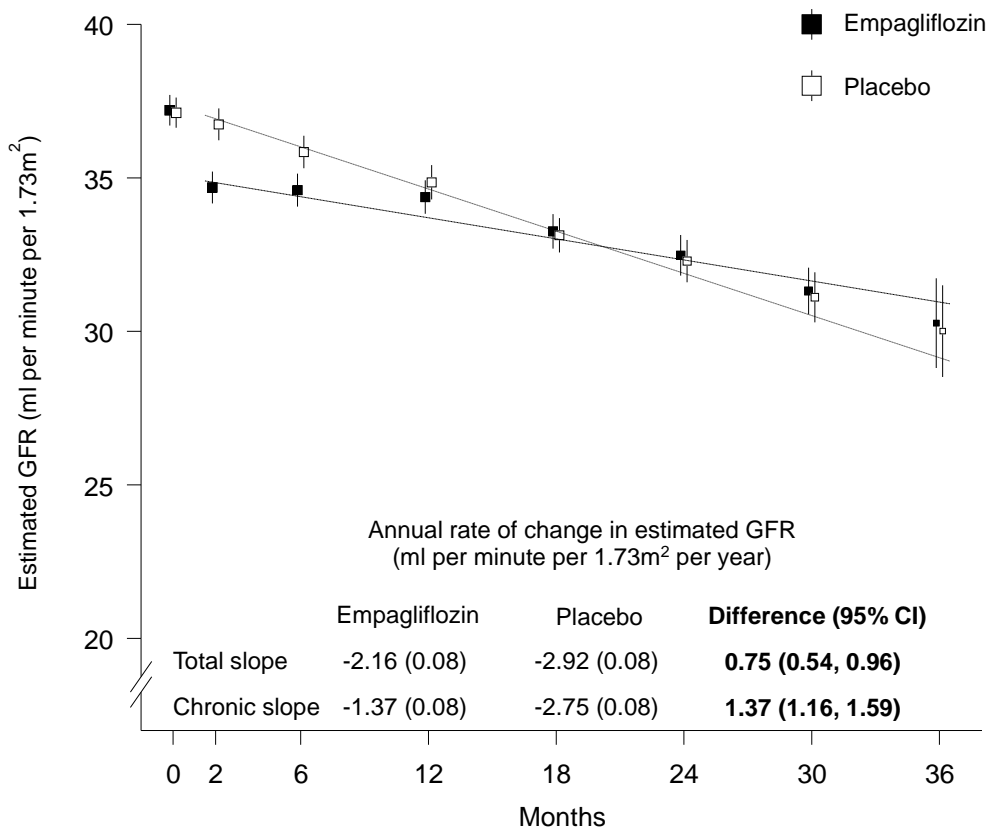

Mean annual rates of change in estimated GFR in ml per minute per 1.73m<sup>2</sup> per year from baseline to the final follow-up visit (“total slopes”), and from 2 months to the final follow-up visit (“chronic slopes”) by treatment allocation were estimated using shared parameter models (tertiary outcome). Observed mean estimated GFR by treatment allocation at each scheduled follow-up visit are plotted (which do not extrapolate missing estimated GFR values beyond the time of ESKD or death, unlike the shared parameter models or the model-based estimates presented in Figure 3). Error bars presented are 95% confidence intervals. X-coordinates of boxes shifted to avoid overlap. See Supplementary Statistical Methods for further details of statistical approaches.

Figure S7. Annual Rate of Change in Estimated GFR by Key Prespecified Subgroups (Prespecified Exploratory Outcome)

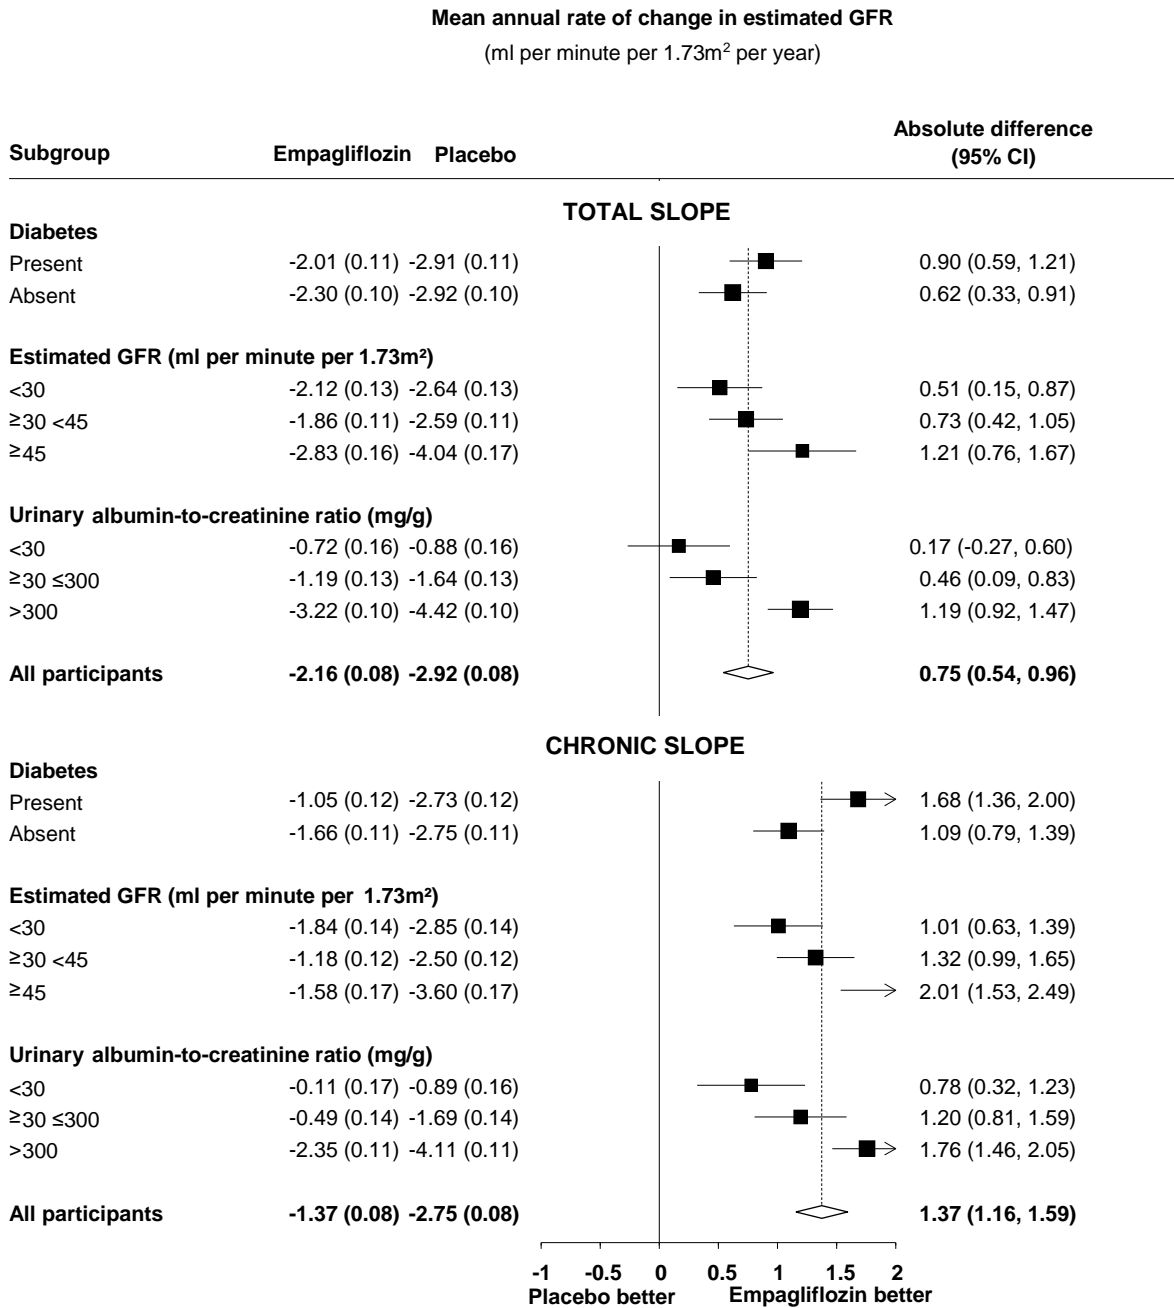

Mean annual rates of change in estimated GFR from baseline to the final follow-up visit (“total slopes”), and from 2 months to the final follow-up visit (“chronic slopes”) by treatment allocation were estimated using shared parameter models. See Supplementary Statistical Methods section for more details of this approach. GFR = glomerular filtration rate.

## Supplementary Tables

Table S1. Representativeness of Study Participants

| <b>Category</b>                                    |                                                                                                                                                                                                                                                                                                                                                                                                                                                                                                                                                                                                                                                                                                                                                                                                                                                                                                                                                                                                                                                                                                                                                                                                         |
|----------------------------------------------------|---------------------------------------------------------------------------------------------------------------------------------------------------------------------------------------------------------------------------------------------------------------------------------------------------------------------------------------------------------------------------------------------------------------------------------------------------------------------------------------------------------------------------------------------------------------------------------------------------------------------------------------------------------------------------------------------------------------------------------------------------------------------------------------------------------------------------------------------------------------------------------------------------------------------------------------------------------------------------------------------------------------------------------------------------------------------------------------------------------------------------------------------------------------------------------------------------------|
| Disease, problem, or condition under investigation | Chronic kidney disease (CKD) at risk of progression                                                                                                                                                                                                                                                                                                                                                                                                                                                                                                                                                                                                                                                                                                                                                                                                                                                                                                                                                                                                                                                                                                                                                     |
| Special considerations related to:                 |                                                                                                                                                                                                                                                                                                                                                                                                                                                                                                                                                                                                                                                                                                                                                                                                                                                                                                                                                                                                                                                                                                                                                                                                         |
| Sex and gender                                     | CKD affects men more than women, and the incidence (and prevalence) of end-stage kidney disease is greater in men than women.                                                                                                                                                                                                                                                                                                                                                                                                                                                                                                                                                                                                                                                                                                                                                                                                                                                                                                                                                                                                                                                                           |
| Age                                                | Prevalence of CKD increases steeply with age.                                                                                                                                                                                                                                                                                                                                                                                                                                                                                                                                                                                                                                                                                                                                                                                                                                                                                                                                                                                                                                                                                                                                                           |
| Race or ethnic group                               | The risks of developing CKD or its progression differ within countries by race and ethnicity. For example, black, Hispanic and Native American people in the USA, black and Asian people in the UK, and indigenous populations in Australia, Canada and South America are all at higher risk compared to the country's white population.                                                                                                                                                                                                                                                                                                                                                                                                                                                                                                                                                                                                                                                                                                                                                                                                                                                                |
| Geography                                          | The crude prevalence of CKD varies globally from 2-15% although this may in part be due to differences in methods of ascertainment. The causes of kidney disease vary substantially between countries. Diabetes causes between 10-55% of CKD; chronic glomerulonephritis causes between 5-40% . However, the cause of kidney disease is frequently unknown.                                                                                                                                                                                                                                                                                                                                                                                                                                                                                                                                                                                                                                                                                                                                                                                                                                             |
| Other considerations                               | Previous large placebo-controlled trials of sodium glucose cotransporter-2 (SGLT2) inhibitors mainly recruited patients with type 2 diabetes and proteinuric CKD. Relatively few patients with CKD without diabetes were studied. The CREDENCE and SCORED trials exclusively studied patients with CKD with type 2 diabetes, and the DAPA-CKD trial in patients with proteinuric CKD studied 1398 patients without diabetes at baseline. Globally the majority of people with CKD have low levels of albuminuria (i.e. a urinary albumin-to-creatinine ratio less than 300 milligrams per gram) and do not have diabetes.                                                                                                                                                                                                                                                                                                                                                                                                                                                                                                                                                                               |
| Overall representativeness of this trial           | <p>Participants in EMPA-KIDNEY were selected to have CKD at risk of progression, so do not represent the larger population of all people with CKD. Patients with polycystic kidney disease were excluded. Nevertheless, EMPA-KIDNEY included a wide range of patients with CKD at risk of progression, and the proportional effects of treatment are likely to be generalizable.</p> <p>Biologic sex (male or female) was reported by the participants and used to calculate estimate glomerular filtration rate. Gender was not reported. The participants in the present trial demonstrated an expected higher number of men than women. The proportion of Black patients who underwent randomization overall was 4%, but among patients enrolled in North America, 17% were Black and 17% were of Hispanic ethnicity. These are similar to the total population distribution of the United States.</p> <p>Causes of CKD, including diabetic kidney disease, were otherwise consistent with registry data where these were available from participating countries. EMPA-KIDNEY recruited patients from centres in Europe, North America and Asia. No patients were enrolled in Africa or Oceania.</p> |

Table S2. Other Characteristics of Participants at Randomization

|                                               | Empagliflozin<br>(N=3304) |        | Placebo<br>(N=3305) |        |
|-----------------------------------------------|---------------------------|--------|---------------------|--------|
| <b>DEMOGRAPHICS</b>                           |                           |        |                     |        |
| <b>Age at randomization (years)</b>           |                           |        |                     |        |
| Mean (SD)                                     | 63.9                      | (13.9) | 63.8                | (13.9) |
| <60                                           | 1136                      | (34%)  | 1116                | (34%)  |
| ≥60 <70                                       | 853                       | (26%)  | 867                 | (26%)  |
| ≥70                                           | 1315                      | (40%)  | 1322                | (40%)  |
| <b>Region</b>                                 |                           |        |                     |        |
| Europe (UK, Germany, Italy)                   | 1344                      | (41%)  | 1304                | (39%)  |
| North America (USA, Canada)                   | 844                       | (26%)  | 873                 | (26%)  |
| China, Malaysia                               | 812                       | (25%)  | 820                 | (25%)  |
| Japan                                         | 304                       | (9%)   | 308                 | (9%)   |
| <b>PRIOR DISEASE</b>                          |                           |        |                     |        |
| <b>History of heart failure</b>               |                           |        |                     |        |
| Yes                                           | 324                       | (10%)  | 334                 | (10%)  |
| No or missing                                 | 2980                      | (90%)  | 2971                | (90%)  |
| <b>History of peripheral arterial disease</b> |                           |        |                     |        |
| Yes                                           | 244                       | (7%)   | 226                 | (7%)   |
| No                                            | 3060                      | (93%)  | 3079                | (93%)  |
| <b>CLINICAL MEASUREMENTS</b>                  |                           |        |                     |        |
| <b>Systolic blood pressure (mmHg)</b>         |                           |        |                     |        |
| Mean (SD)                                     | 136.4                     | (18.1) | 136.7               | (18.4) |
| <130                                          | 1190                      | (36%)  | 1208                | (37%)  |
| ≥130 <145                                     | 1126                      | (34%)  | 1063                | (32%)  |
| ≥145                                          | 988                       | (30%)  | 1034                | (31%)  |
| <b>Diastolic blood pressure (mmHg)</b>        |                           |        |                     |        |
| Mean (SD)                                     | 78.1                      | (11.7) | 78.1                | (11.9) |
| <75                                           | 1294                      | (39%)  | 1286                | (39%)  |
| ≥75 <85                                       | 1019                      | (31%)  | 1033                | (31%)  |
| ≥85                                           | 991                       | (30%)  | 986                 | (30%)  |
| <b>Body mass index (kg/m<sup>2</sup>)</b>     |                           |        |                     |        |
| Mean (SD)                                     | 29.7                      | (6.7)  | 29.8                | (6.8)  |
| <25                                           | 798                       | (24%)  | 821                 | (25%)  |
| ≥25 <30                                       | 1157                      | (35%)  | 1140                | (34%)  |
| ≥30                                           | 1340                      | (41%)  | 1337                | (40%)  |
| Missing                                       | 9                         | (<1%)  | 7                   | (<1%)  |
| <b>LABORATORY MEASUREMENTS</b>                |                           |        |                     |        |
| <b>Glycated hemoglobin (mmol/mol)</b>         |                           |        |                     |        |
| Mean (SD)                                     | 45.0                      | (13.5) | 45.0                | (13.7) |
| <39                                           | 1329                      | (40%)  | 1353                | (41%)  |
| ≥39 <48                                       | 940                       | (28%)  | 897                 | (27%)  |
| ≥48                                           | 977                       | (30%)  | 999                 | (30%)  |
| Missing                                       | 58                        | (2%)   | 56                  | (2%)   |

(Continued on next page)

Table S2. Other Characteristics of Participants at Recruitment (continued)

|                                                                                                                                                                                                                                                                                                  | Empagliflozin<br>(N=3304) |               | Placebo<br>(N=3305) |               |
|--------------------------------------------------------------------------------------------------------------------------------------------------------------------------------------------------------------------------------------------------------------------------------------------------|---------------------------|---------------|---------------------|---------------|
| <b>NT-proBNP (ng/L)</b>                                                                                                                                                                                                                                                                          |                           |               |                     |               |
| Geometric mean (95% CI)                                                                                                                                                                                                                                                                          | 172.3                     | (164.0-180.9) | 167.1               | (159.2-175.5) |
| Median (Q1-Q3)                                                                                                                                                                                                                                                                                   | 162.0                     | (70.0-421.2)  | 158.5               | (67.7-417.4)  |
| <b>Hematocrit (%)</b>                                                                                                                                                                                                                                                                            |                           |               |                     |               |
| Mean (SD)                                                                                                                                                                                                                                                                                        | 39.1                      | (5.1)         | 39.1                | (5.1)         |
| <b>KDIGO risk category</b>                                                                                                                                                                                                                                                                       |                           |               |                     |               |
| Low, moderate or high                                                                                                                                                                                                                                                                            | 839                       | (25%)         | 833                 | (25%)         |
| Very high                                                                                                                                                                                                                                                                                        | 2465                      | (75%)         | 2472                | (75%)         |
| <b>Estimated GFR (ml per minute per 1.73m<sup>2</sup>) and urinary ACR (mg/g)*</b>                                                                                                                                                                                                               |                           |               |                     |               |
| Estimated GFR <45 and urinary ACR <200                                                                                                                                                                                                                                                           | 1182                      | (36%)         | 1203                | (36%)         |
| Estimated GFR <45 and urinary ACR ≥200                                                                                                                                                                                                                                                           | 1416                      | (43%)         | 1409                | (43%)         |
| Estimated GFR ≥45                                                                                                                                                                                                                                                                                | 706                       | (21%)         | 693                 | (21%)         |
| <b>CONCOMITANT MEDICATION USE</b>                                                                                                                                                                                                                                                                |                           |               |                     |               |
| Any diuretic                                                                                                                                                                                                                                                                                     | 1362                      | (41%)         | 1453                | (44%)         |
| Loop diuretic                                                                                                                                                                                                                                                                                    | 851                       | (26%)         | 896                 | (27%)         |
| Thiazide diuretic                                                                                                                                                                                                                                                                                | 547                       | (17%)         | 575                 | (17%)         |
| Mineralocorticoid receptor antagonist                                                                                                                                                                                                                                                            | 229                       | (7%)          | 246                 | (7%)          |
| Potassium sparing & other                                                                                                                                                                                                                                                                        | 30                        | (1%)          | 8                   | (<1%)         |
| Beta blocker                                                                                                                                                                                                                                                                                     | 1396                      | (42%)         | 1365                | (41%)         |
| Anticoagulant                                                                                                                                                                                                                                                                                    | 161                       | (5%)          | 155                 | (5%)          |
| Antiplatelet therapy                                                                                                                                                                                                                                                                             | 1105                      | (33%)         | 1134                | (34%)         |
| <b>Diabetes treatment</b>                                                                                                                                                                                                                                                                        |                           |               |                     |               |
| Biguanide (e.g. metformin)                                                                                                                                                                                                                                                                       | 332                       | (10%)         | 337                 | (10%)         |
| Sulphonylurea                                                                                                                                                                                                                                                                                    | 310                       | (9%)          | 275                 | (8%)          |
| Insulin                                                                                                                                                                                                                                                                                          | 823                       | (25%)         | 840                 | (25%)         |
| DPP-4 inhibitor                                                                                                                                                                                                                                                                                  | 446                       | (13%)         | 436                 | (13%)         |
| GLP-1 agonist                                                                                                                                                                                                                                                                                    | 173                       | (5%)          | 164                 | (5%)          |
| Other antidiabetic agent                                                                                                                                                                                                                                                                         | 173                       | (5%)          | 141                 | (4%)          |
| Figures are n (%) or mean (SD).                                                                                                                                                                                                                                                                  |                           |               |                     |               |
| * Post-hoc category.                                                                                                                                                                                                                                                                             |                           |               |                     |               |
| Abbreviations: NT-proBNP = N-terminal pro B-type natriuretic peptide; KDIGO = Kidney Disease: Improving Global Outcomes; GFR = glomerular filtration rate; ACR = albumin-to-creatinine ratio; DPP-4 = dipeptidyl peptidase-4; GLP-1 = glucagon-like peptide-1. GFR = glomerular filtration rate. |                           |               |                     |               |
| Values are those from the randomization visit where available, otherwise from the screening visit.                                                                                                                                                                                               |                           |               |                     |               |



Table S3. Reasons for Discontinuing Randomized Treatment

|                                                                      | Empagliflozin<br>(N=3304) |        | Placebo<br>(N=3305) |        |
|----------------------------------------------------------------------|---------------------------|--------|---------------------|--------|
| <b>Serious adverse event (SAE)</b>                                   |                           |        |                     |        |
| Cardiac disorders                                                    | 5                         | (0.2%) | 12                  | (0.4%) |
| Eye disorders                                                        | 0                         | (0.0%) | 2                   | (0.1%) |
| Gastrointestinal disorders                                           | 1                         | (0.0%) | 2                   | (0.1%) |
| General disorders and administration site conditions                 | 1                         | (0.0%) | 0                   | (0.0%) |
| Hepatobiliary disorders                                              | 1                         | (0.0%) | 3                   | (0.1%) |
| Infections and infestations                                          | 7                         | (0.2%) | 8                   | (0.2%) |
| Injury, poisoning and procedural complication                        | 1                         | (0.0%) | 2                   | (0.1%) |
| Investigations                                                       | 5                         | (0.2%) | 6                   | (0.2%) |
| Metabolism and nutrition disorders                                   | 1                         | (0.0%) | 2                   | (0.1%) |
| Neoplasms benign, malignant and unspecified (incl. cysts and polyps) | 7                         | (0.2%) | 7                   | (0.2%) |
| Nervous system disorders                                             | 4                         | (0.1%) | 1                   | (0.0%) |
| Psychiatric disorders                                                | 0                         | (0.0%) | 1                   | (0.0%) |
| Renal and urinary disorders                                          | 16                        | (0.5%) | 15                  | (0.5%) |
| Respiratory, thoracic and mediastinal disorders                      | 0                         | (0.0%) | 1                   | (0.0%) |
| Skin and subcutaneous tissue disorders                               | 0                         | (0.0%) | 1                   | (0.0%) |
| Surgical and medical procedures                                      | 5                         | (0.2%) | 11                  | (0.3%) |
| Vascular disorders                                                   | 5                         | (0.2%) | 1                   | (0.0%) |
| <i>Subtotal: Any SAE</i>                                             | 59                        | (1.8%) | 75                  | (2.3%) |
| <b>Non-serious adverse event (NSAE)</b>                              |                           |        |                     |        |
| Ear and labyrinth disorders                                          | 0                         | (0.0%) | 1                   | (0.0%) |
| Gastrointestinal disorders                                           | 5                         | (0.2%) | 2                   | (0.1%) |
| General disorders and administration site conditions                 | 3                         | (0.1%) | 2                   | (0.1%) |
| Hepatobiliary disorders                                              | 1                         | (0.0%) | 1                   | (0.0%) |
| Infections and infestations                                          | 19                        | (0.6%) | 7                   | (0.2%) |
| Investigations                                                       | 11                        | (0.3%) | 9                   | (0.3%) |
| Metabolism and nutrition disorders                                   | 4                         | (0.1%) | 3                   | (0.1%) |
| Nervous system disorders                                             | 4                         | (0.1%) | 6                   | (0.2%) |
| Renal and urinary disorders                                          | 3                         | (0.1%) | 5                   | (0.2%) |
| Reproductive system and breast disorders                             | 2                         | (0.1%) | 1                   | (0.0%) |
| Skin and subcutaneous tissue disorders                               | 6                         | (0.2%) | 3                   | (0.1%) |
| Vascular disorders                                                   | 0                         | (0.0%) | 2                   | (0.1%) |
| <i>Subtotal: Any NSAE</i>                                            | 58                        | (1.8%) | 42                  | (1.3%) |
| <b>Other reasons</b>                                                 |                           |        |                     |        |
| In another trial or study                                            | 1                         | (0.0%) | 1                   | (0.0%) |
| Trial administration problem                                         | 1                         | (0.0%) | 2                   | (0.1%) |
| Relatives concerned about study treatment                            | 5                         | (0.2%) | 4                   | (0.1%) |
| Cannot attend clinic because of occupational problems                | 1                         | (0.0%) | 0                   | (0.0%) |
| Cannot attend clinic because of transport problems                   | 7                         | (0.2%) | 7                   | (0.2%) |
| Cannot attend clinic because moving out of the area                  | 9                         | (0.3%) | 15                  | (0.5%) |
| Cannot attend clinic because of personal problems                    | 16                        | (0.5%) | 8                   | (0.2%) |
| Participant concerned about taking too many tablets                  | 4                         | (0.1%) | 7                   | (0.2%) |
| Participant concerned about study treatment                          | 28                        | (0.8%) | 23                  | (0.7%) |
| Undergoing investigations                                            | 2                         | (0.1%) | 7                   | (0.2%) |
| Contraindicated drug started                                         | 18                        | (0.5%) | 31                  | (0.9%) |
| Difficulty taking study medication                                   | 4                         | (0.1%) | 6                   | (0.2%) |
| Doctor advice                                                        | 41                        | (1.2%) | 39                  | (1.2%) |
| Participant wishes                                                   | 68                        | (2.1%) | 92                  | (2.8%) |
| Convalescent                                                         | 0                         | (0.0%) | 1                   | (0.0%) |
| Death of relative                                                    | 1                         | (0.0%) | 0                   | (0.0%) |

(Continued on next page)

Table S3. Reasons for Discontinuing Randomized Treatment (continued)

|                                   | Empagliflozin<br>(N=3304) |         | Placebo<br>(N=3305) |         |
|-----------------------------------|---------------------------|---------|---------------------|---------|
| Disability                        | 2                         | (0.1%)  | 0                   | (0.0%)  |
| Family stress                     | 2                         | (0.1%)  | 4                   | (0.1%)  |
| Foreign travel                    | 1                         | (0.0%)  | 0                   | (0.0%)  |
| Immobile                          | 4                         | (0.1%)  | 2                   | (0.1%)  |
| Imprisonment                      | 0                         | (0.0%)  | 1                   | (0.0%)  |
| Job change                        | 0                         | (0.0%)  | 1                   | (0.0%)  |
| Living in residential institution | 0                         | (0.0%)  | 2                   | (0.1%)  |
| Marital problem                   | 1                         | (0.0%)  | 0                   | (0.0%)  |
| Sick relative                     | 0                         | (0.0%)  | 1                   | (0.0%)  |
| Stress at work                    | 1                         | (0.0%)  | 0                   | (0.0%)  |
| Refusal of treatment by relative  | 1                         | (0.0%)  | 1                   | (0.0%)  |
| Refusal of treatment by patient   | 8                         | (0.2%)  | 13                  | (0.4%)  |
| <i>Subtotal: Any other reason</i> | 226                       | (6.8%)  | 268                 | (8.1%)  |
| <b>Unknown reason</b>             | 214                       | (6.5%)  | 255                 | (7.7%)  |
| <b>Any reason</b>                 | 557                       | (16.9%) | 640                 | (19.4%) |

Figures are number of participants (%).  
Participants who died while on study treatment or who stopped study treatment within 7 days of their final follow-up visit are not included.

Table S4. All Hospitalizations Grouped By MedDRA System Organ Class

|                                                      | Empagliflozin<br>(N=3304) |        | Placebo<br>(N=3305) |        | Hazard ratio<br>(95% CI) |
|------------------------------------------------------|---------------------------|--------|---------------------|--------|--------------------------|
| Blood and lymphatic disorder                         | 19                        | (0.6%) | 25                  | (0.8%) | 0.76 (0.42-1.37)         |
| Cardiac disorder <sup>†</sup>                        | 196                       | (5.9%) | 215                 | (6.5%) | 0.90 (0.74-1.09)         |
| Congenital, familial and genetic disorders           | 2                         | (0.1%) | 4                   | (0.1%) |                          |
| Ear and labyrinth disorder                           | 7                         | (0.2%) | 3                   | (0.1%) | 2.40 (0.61-9.40)         |
| Endocrine disorder                                   | 0                         | (0.0%) | 2                   | (0.1%) |                          |
| Eye disorder                                         | 11                        | (0.3%) | 8                   | (0.2%) | 1.40 (0.56-3.49)         |
| Gastrointestinal disorder                            | 76                        | (2.3%) | 93                  | (2.8%) | 0.81 (0.60-1.10)         |
| General disorders and administration site conditions | 20                        | (0.6%) | 35                  | (1.1%) | 0.56 (0.32-0.97)         |
| Hepatobiliary disorders                              | 25                        | (0.8%) | 23                  | (0.7%) | 1.08 (0.61-1.91)         |
| Immune system disorders                              | 5                         | (0.2%) | 0                   | (0.0%) |                          |
| Infections and infestations                          | 258                       | (7.8%) | 269                 | (8.1%) | 0.95 (0.80-1.13)         |
| Injury, poisoning and procedural complications       | 96                        | (2.9%) | 94                  | (2.8%) | 1.01 (0.76-1.35)         |
| Investigations                                       | 114                       | (3.5%) | 133                 | (4.0%) | 0.85 (0.66-1.09)         |
| Metabolism and nutrition disorders                   | 99                        | (3.0%) | 109                 | (3.3%) | 0.89 (0.68-1.17)         |
| Musculoskeletal and connective tissue disorders      | 31                        | (0.9%) | 38                  | (1.1%) | 0.82 (0.51-1.31)         |
| Neoplasms benign, malignant and unspecified          | 59                        | (1.8%) | 75                  | (2.3%) | 0.78 (0.56-1.10)         |
| Nervous system disorders                             | 95                        | (2.9%) | 103                 | (3.1%) | 0.92 (0.69-1.21)         |
| Pregnancy, puerperium and perinatal conditions       | 1                         | (0.0%) | 0                   | (0.0%) |                          |
| Psychiatric disorders                                | 6                         | (0.2%) | 15                  | (0.5%) | 0.39 (0.15-1.01)         |
| Renal and urinary disorders                          | 151                       | (4.6%) | 184                 | (5.6%) | 0.81 (0.65-1.01)         |
| Reproductive system and breast disorders             | 4                         | (0.1%) | 5                   | (0.2%) |                          |
| Respiratory, thoracic and mediastinal disorders      | 44                        | (1.3%) | 47                  | (1.4%) | 0.93 (0.62-1.40)         |
| Skin and subcutaneous tissue disorders               | 9                         | (0.3%) | 13                  | (0.4%) | 0.68 (0.29-1.60)         |
| Social circumstances                                 | 2                         | (0.1%) | 0                   | (0.0%) |                          |
| Surgical and medical procedures                      | 237                       | (7.2%) | 282                 | (8.5%) | 0.83 (0.70-0.99)         |
| Vascular disorders                                   | 42                        | (1.3%) | 55                  | (1.7%) | 0.75 (0.50-1.12)         |

Figures are number of participants (%). Hazard ratio estimates are derived from Cox proportional hazards regression models as described in the statistical methods section. Hazard ratios not shown when fewer than 10 events occurred.

\* Hospitalization defined as the reason for the adverse event being serious is hospitalization.

† Cardiac disorders included hospitalization for heart failure. There were 88 (2.7%) first hospitalizations for heart failure in the empagliflozin group versus 107 (3.2%) in the placebo group: hazard ratio, 0.80, 95% CI 0.60-1.06. Abbreviations: MedDRA = Medical Dictionary for Regulatory Activities.

Table S5. Other Secondary and Tertiary Outcomes

|                                                                                                                                                                                                                                                                                                                                                                                                                                                                                                                                                                                                                                                                                                                                                                                                                                                | Empagliflozin<br>(N=3304) |         | Placebo<br>(N=3305) |         | Hazard ratio<br>(95% CI) |
|------------------------------------------------------------------------------------------------------------------------------------------------------------------------------------------------------------------------------------------------------------------------------------------------------------------------------------------------------------------------------------------------------------------------------------------------------------------------------------------------------------------------------------------------------------------------------------------------------------------------------------------------------------------------------------------------------------------------------------------------------------------------------------------------------------------------------------------------|---------------------------|---------|---------------------|---------|--------------------------|
| <b>Kidney disease progression overall and by components</b>                                                                                                                                                                                                                                                                                                                                                                                                                                                                                                                                                                                                                                                                                                                                                                                    |                           |         |                     |         |                          |
| ESKD <sup>†</sup>                                                                                                                                                                                                                                                                                                                                                                                                                                                                                                                                                                                                                                                                                                                                                                                                                              | 108                       | (3.3%)  | 158                 | (4.8%)  | 0.67 (0.52-0.85)         |
| Sustained estimated GFR <10 ml per minute per 1.73 m <sup>2</sup> ‡                                                                                                                                                                                                                                                                                                                                                                                                                                                                                                                                                                                                                                                                                                                                                                            | 116                       | (3.5%)  | 167                 | (5.1%)  | 0.69 (0.54-0.87)         |
| Death from renal causes                                                                                                                                                                                                                                                                                                                                                                                                                                                                                                                                                                                                                                                                                                                                                                                                                        | 4                         | (0.1%)  | 4                   | (0.1%)  | 0.90 (0.22-3.66)         |
| ESKD, sustained estimated GFR <10 ml per minute per 1.73 m <sup>2</sup> , or death from renal causes                                                                                                                                                                                                                                                                                                                                                                                                                                                                                                                                                                                                                                                                                                                                           | 158                       | (4.8%)  | 221                 | (6.7%)  | 0.69 (0.56-0.85)         |
| Sustained ≥40% decline in estimated GFR from randomization‡                                                                                                                                                                                                                                                                                                                                                                                                                                                                                                                                                                                                                                                                                                                                                                                    | 359                       | (10.9%) | 474                 | (14.3%) | 0.70 (0.61-0.81)         |
| Any kidney disease progression                                                                                                                                                                                                                                                                                                                                                                                                                                                                                                                                                                                                                                                                                                                                                                                                                 | 384                       | (11.6%) | 504                 | (15.2%) | 0.71 (0.62-0.81)         |
| <b>Other tertiary outcomes</b>                                                                                                                                                                                                                                                                                                                                                                                                                                                                                                                                                                                                                                                                                                                                                                                                                 |                           |         |                     |         |                          |
| ESKD or death from any cause                                                                                                                                                                                                                                                                                                                                                                                                                                                                                                                                                                                                                                                                                                                                                                                                                   | 245                       | (7.4%)  | 299                 | (9.0%)  | 0.80 (0.67-0.94)         |
| Kidney disease progression or death from any cause                                                                                                                                                                                                                                                                                                                                                                                                                                                                                                                                                                                                                                                                                                                                                                                             | 498                       | (15.1%) | 625                 | (18.9%) | 0.75 (0.67-0.84)         |
| Major cardiovascular event <sup>§</sup>                                                                                                                                                                                                                                                                                                                                                                                                                                                                                                                                                                                                                                                                                                                                                                                                        | 200                       | (6.1%)  | 213                 | (6.4%)  | 0.93 (0.76-1.12)         |
| Self-reported gout                                                                                                                                                                                                                                                                                                                                                                                                                                                                                                                                                                                                                                                                                                                                                                                                                             | 278                       | (8.4%)  | 317                 | (9.6%)  | 0.87 (0.74-1.02)         |
| <p>Figures are number with event (%). Hazard ratio estimates are derived from Cox proportional hazards regression models as described in the statistical methods section.</p> <p><sup>†</sup> ESKD defined as start of maintenance dialysis or receipt of a kidney transplant.</p> <p><sup>‡</sup> Sustained defined as present on two consecutive scheduled study follow-up visits or last scheduled follow-up visit prior to death or final follow-up (or withdrawal of consent). Estimated GFR measurements based on central laboratory measurements, wherever available.</p> <p><sup>§</sup> Major cardiovascular event defined as the composite of cardiovascular death, myocardial infarction, stroke or hospitalization for heart failure.</p> <p>Abbreviations: ESKD = end-stage kidney disease; GFR = glomerular filtration rate.</p> |                           |         |                     |         |                          |

Table S6. New-Onset Diabetes

|                                                                                                                                                                                                                                                                                                                                                                                                                                                                                                                 | Empagliflozin<br>(N=1779)   | Placebo<br>(N=1790)         | Hazard ratio<br>(95% CI) |
|-----------------------------------------------------------------------------------------------------------------------------------------------------------------------------------------------------------------------------------------------------------------------------------------------------------------------------------------------------------------------------------------------------------------------------------------------------------------------------------------------------------------|-----------------------------|-----------------------------|--------------------------|
| Normoglycaemia<br>(HbA1c <39 mmol/mol)                                                                                                                                                                                                                                                                                                                                                                                                                                                                          | 6 / 1218 (<0.1%)            | 14 / 1254 (<0.1%)           | 0.43 (0.17-1.13)         |
| Pre-diabetes<br>(HbA1c ≥39 <48 mmol/mol)                                                                                                                                                                                                                                                                                                                                                                                                                                                                        | 45 / 561 (0.1%)             | 47 / 536 (0.1%)             | 0.91 (0.60-1.37)         |
| <b>All participants<sup>†</sup></b>                                                                                                                                                                                                                                                                                                                                                                                                                                                                             | <b>51 / 1779 (&lt;0.1%)</b> | <b>61 / 1790 (&lt;0.1%)</b> | <b>0.82 (0.56-1.19)</b>  |
| <p>Figures are number of participants (%). Hazard ratio estimates are derived from Cox proportional hazards regression models as described in the statistical methods section.<br/>           New-onset diabetes is defined as clinical diagnosis, commencement of glucose-lowering treatment, or HbA1c ≥48 mmol/mol measured by central laboratory on at least one occasion.<br/> <sup>†</sup> Excludes participants with diabetes at baseline.<br/>           Abbreviations: HbA1c = glycated hemoglobin.</p> |                             |                             |                          |

Table S7. Additional Safety Outcomes

|                                                                                                                                                                                                                                                                                                                                              | Empagliflozin<br>(N=3304) |         | Placebo<br>(N=3305) |         | Hazard ratio<br>(95% CI) |
|----------------------------------------------------------------------------------------------------------------------------------------------------------------------------------------------------------------------------------------------------------------------------------------------------------------------------------------------|---------------------------|---------|---------------------|---------|--------------------------|
| <b>Serious urinary tract infection, by sex</b>                                                                                                                                                                                                                                                                                               |                           |         |                     |         |                          |
| Male                                                                                                                                                                                                                                                                                                                                         | 30 / 2207                 | (1.4%)  | 32 / 2210           | (1.4%)  |                          |
| Female                                                                                                                                                                                                                                                                                                                                       | 22 / 1097                 | (2.0%)  | 22 / 1095           | (2.0%)  |                          |
| Total: serious urinary tract infection                                                                                                                                                                                                                                                                                                       | 52                        | (1.6%)  | 54                  | (1.6%)  | 0.94 (0.64-1.37)         |
| <b>Serious genital infection, by sex</b>                                                                                                                                                                                                                                                                                                     |                           |         |                     |         |                          |
| Male                                                                                                                                                                                                                                                                                                                                         | 0 / 2207                  | (0.0%)  | 1 / 2210            | (<0.1%) |                          |
| Female                                                                                                                                                                                                                                                                                                                                       | 1 / 1097                  | (0.1%)  | 0 / 1095            | (0.0%)  |                          |
| Total: serious genital infection*                                                                                                                                                                                                                                                                                                            | 1                         | (<0.1%) | 1                   | (<0.1%) |                          |
| <b>Liver injury, by cause†</b>                                                                                                                                                                                                                                                                                                               |                           |         |                     |         |                          |
| Infection                                                                                                                                                                                                                                                                                                                                    | 1                         | (<0.1%) | 2                   | (0.1%)  |                          |
| Alcohol                                                                                                                                                                                                                                                                                                                                      | 1                         | (<0.1%) | 0                   | (0.0%)  |                          |
| Drug toxicity                                                                                                                                                                                                                                                                                                                                | 1                         | (<0.1%) | 4                   | (0.1%)  |                          |
| Obstruction/cholestasis                                                                                                                                                                                                                                                                                                                      | 1                         | (<0.1%) | 2                   | (0.1%)  |                          |
| Hepatic congestion                                                                                                                                                                                                                                                                                                                           | 0                         | (0.0%)  | 1                   | (<0.1%) |                          |
| Non-alcoholic fatty liver disease                                                                                                                                                                                                                                                                                                            | 1                         | (<0.1%) | 1                   | (<0.1%) |                          |
| Other cause                                                                                                                                                                                                                                                                                                                                  | 2                         | (0.1%)  | 1                   | (<0.1%) |                          |
| Unknown cause                                                                                                                                                                                                                                                                                                                                | 6                         | (0.2%)  | 1                   | (<0.1%) |                          |
| Total: all liver injury                                                                                                                                                                                                                                                                                                                      | 13                        | (0.4%)  | 12                  | (0.4%)  | 1.09 (0.50-2.38)         |
| <b>Ketoacidosis, by diabetes status†</b>                                                                                                                                                                                                                                                                                                     |                           |         |                     |         |                          |
| Prior diabetes                                                                                                                                                                                                                                                                                                                               | 5 / 1525                  | (0.3%)  | 1 / 1515            | (0.1%)  |                          |
| No prior diabetes                                                                                                                                                                                                                                                                                                                            | 1 / 1779                  | (0.1%)  | 0 / 1790            | (0.0%)  |                          |
| Total: all ketoacidosis                                                                                                                                                                                                                                                                                                                      | 6                         | (0.2%)  | 1                   | (<0.1%) |                          |
| <b>Lower limb amputation, by level†</b>                                                                                                                                                                                                                                                                                                      |                           |         |                     |         |                          |
| Toe                                                                                                                                                                                                                                                                                                                                          | 20                        | (0.6%)  | 14                  | (0.4%)  |                          |
| Forefoot                                                                                                                                                                                                                                                                                                                                     | 7                         | (0.2%)  | 1                   | (<0.1%) |                          |
| Foot                                                                                                                                                                                                                                                                                                                                         | 0                         | (<0.1%) | 0                   | (<0.1%) |                          |
| Below knee                                                                                                                                                                                                                                                                                                                                   | 5                         | (0.2%)  | 4                   | (0.1%)  |                          |
| Above knee                                                                                                                                                                                                                                                                                                                                   | 2                         | (0.1%)  | 1                   | (<0.1%) |                          |
| Total: lower limb amputation                                                                                                                                                                                                                                                                                                                 | 28                        | (0.8%)  | 19                  | (0.6%)  | 1.43 (0.80-2.57)         |
| <b>Bone fracture, by site and by aetiology</b>                                                                                                                                                                                                                                                                                               |                           |         |                     |         |                          |
| By site                                                                                                                                                                                                                                                                                                                                      |                           |         |                     |         |                          |
| Long bone fracture                                                                                                                                                                                                                                                                                                                           | 57                        | (1.7%)  | 65                  | (2.0%)  |                          |
| Non-long bone fracture                                                                                                                                                                                                                                                                                                                       | 77                        | (2.3%)  | 63                  | (1.9%)  |                          |
| By aetiology                                                                                                                                                                                                                                                                                                                                 |                           |         |                     |         |                          |
| High impact fracture                                                                                                                                                                                                                                                                                                                         | 21                        | (0.6%)  | 10                  | (0.3%)  |                          |
| Low impact fracture                                                                                                                                                                                                                                                                                                                          | 95                        | (2.9%)  | 89                  | (2.7%)  |                          |
| Other cause                                                                                                                                                                                                                                                                                                                                  | 20                        | (0.6%)  | 28                  | (0.8%)  |                          |
| Total: bone fracture                                                                                                                                                                                                                                                                                                                         | 133                       | (4.0%)  | 123                 | (3.7%)  | 1.08 (0.84-1.38)         |
| Figures are number of participants (%). Hazard ratio estimates are derived from Cox proportional hazards regression models as described in the statistical methods section.                                                                                                                                                                  |                           |         |                     |         |                          |
| * Serious genital infections were defined as any bacterial or fungal infection of the genitals or perineum, including vulvovaginitis, balanitis and infections of skin between the genital and anus which met standard ICH-GCP criteria for seriousness. There were no cases of necrotising fasciitis of the perineum (Fournier's gangrene). |                           |         |                     |         |                          |
| † Includes both serious and non-serious adverse events.                                                                                                                                                                                                                                                                                      |                           |         |                     |         |                          |

Table S8. All Serious Adverse Events Grouped By MedDRA System Organ Class

|                                                                                                                                                                                                                                                                                                                          | Empagliflozin<br>(N=3304) |                | Placebo<br>(N=3305) |                | Hazard ratio<br>(95% CI) |
|--------------------------------------------------------------------------------------------------------------------------------------------------------------------------------------------------------------------------------------------------------------------------------------------------------------------------|---------------------------|----------------|---------------------|----------------|--------------------------|
| Blood and lymphatic disorder                                                                                                                                                                                                                                                                                             | 19                        | (0.6%)         | 27                  | (0.8%)         | 0.70 (0.39-1.26)         |
| Cardiac disorder                                                                                                                                                                                                                                                                                                         | 209                       | (6.3%)         | 228                 | (6.9%)         | 0.90 (0.75-1.09)         |
| Congenital, familial and genetic disorders                                                                                                                                                                                                                                                                               | 2                         | (0.1%)         | 5                   | (0.2%)         |                          |
| Ear and labyrinth disorder                                                                                                                                                                                                                                                                                               | 7                         | (0.2%)         | 6                   | (0.2%)         | 1.16 (0.39-3.46)         |
| Endocrine disorder                                                                                                                                                                                                                                                                                                       | 1                         | (0.0%)         | 3                   | (0.1%)         |                          |
| Eye disorder                                                                                                                                                                                                                                                                                                             | 18                        | (0.5%)         | 16                  | (0.5%)         | 1.13 (0.58-2.22)         |
| Gastrointestinal disorder                                                                                                                                                                                                                                                                                                | 76                        | (2.3%)         | 96                  | (2.9%)         | 0.78 (0.58-1.06)         |
| General disorders and administration site conditions                                                                                                                                                                                                                                                                     | 45                        | (1.4%)         | 64                  | (1.9%)         | 0.69 (0.47-1.01)         |
| Hepatobiliary disorders                                                                                                                                                                                                                                                                                                  | 30                        | (0.9%)         | 27                  | (0.8%)         | 1.10 (0.66-1.86)         |
| Immune system disorders                                                                                                                                                                                                                                                                                                  | 5                         | (0.2%)         | 0                   | (0.0%)         |                          |
| Infections and infestations                                                                                                                                                                                                                                                                                              | 319                       | (9.7%)         | 332                 | (10.0%)        | 0.95 (0.82-1.11)         |
| Injury, poisoning and procedural complications                                                                                                                                                                                                                                                                           | 114                       | (3.5%)         | 108                 | (3.3%)         | 1.05 (0.81-1.37)         |
| Investigations                                                                                                                                                                                                                                                                                                           | 182                       | (5.5%)         | 214                 | (6.5%)         | 0.84 (0.69-1.02)         |
| Metabolism and nutrition disorders                                                                                                                                                                                                                                                                                       | 127                       | (3.8%)         | 137                 | (4.1%)         | 0.92 (0.72-1.17)         |
| Musculoskeletal and connective tissue disorders                                                                                                                                                                                                                                                                          | 41                        | (1.2%)         | 44                  | (1.3%)         | 0.93 (0.61-1.42)         |
| Neoplasms benign, malignant and unspecified                                                                                                                                                                                                                                                                              | 117                       | (3.5%)         | 126                 | (3.8%)         | 0.92 (0.72-1.19)         |
| Nervous system disorders                                                                                                                                                                                                                                                                                                 | 111                       | (3.4%)         | 118                 | (3.6%)         | 0.93 (0.72-1.21)         |
| Pregnancy, puerperium and perinatal conditions                                                                                                                                                                                                                                                                           | 1                         | (0.0%)         | 0                   | (0.0%)         |                          |
| Psychiatric disorders                                                                                                                                                                                                                                                                                                    | 7                         | (0.2%)         | 16                  | (0.5%)         | 0.43 (0.18-1.05)         |
| Renal and urinary disorders                                                                                                                                                                                                                                                                                              | 180                       | (5.4%)         | 211                 | (6.4%)         | 0.85 (0.69-1.03)         |
| Reproductive system and breast disorders                                                                                                                                                                                                                                                                                 | 4                         | (0.1%)         | 5                   | (0.2%)         |                          |
| Respiratory, thoracic and mediastinal disorders                                                                                                                                                                                                                                                                          | 48                        | (1.5%)         | 57                  | (1.7%)         | 0.84 (0.57-1.23)         |
| Skin and subcutaneous tissue disorders                                                                                                                                                                                                                                                                                   | 10                        | (0.3%)         | 16                  | (0.5%)         | 0.60 (0.27-1.33)         |
| Social circumstances                                                                                                                                                                                                                                                                                                     | 2                         | (0.1%)         | 0                   | (0.0%)         |                          |
| Surgical and medical procedures                                                                                                                                                                                                                                                                                          | 255                       | (7.7%)         | 304                 | (9.2%)         | 0.83 (0.70-0.98)         |
| Vascular disorders                                                                                                                                                                                                                                                                                                       | 47                        | (1.4%)         | 68                  | (2.1%)         | 0.68 (0.47-0.99)         |
| <b>Total: Any Serious Adverse Event</b>                                                                                                                                                                                                                                                                                  | <b>1164</b>               | <b>(35.2%)</b> | <b>1245</b>         | <b>(37.7%)</b> | <b>0.92 (0.85-0.99)</b>  |
| <p>Figures are number of participants (%). Hazard ratio estimates are derived from Cox proportional hazards regression models as described in the statistical methods section. Hazard ratios not shown when fewer than 10 events occurred.<br/>Abbreviations: MedDRA = Medical Dictionary for Regulatory Activities.</p> |                           |                |                     |                |                          |

Table S9a. Physical and Laboratory Assessments

|                                                                                                                                                                                                                                                                                                                                                                                                                                                                                                                                                                                                                                                                                                                                                      | Empagliflozin<br>(N=3273)           |        | Placebo<br>(N=3265) |        | Difference |                |
|------------------------------------------------------------------------------------------------------------------------------------------------------------------------------------------------------------------------------------------------------------------------------------------------------------------------------------------------------------------------------------------------------------------------------------------------------------------------------------------------------------------------------------------------------------------------------------------------------------------------------------------------------------------------------------------------------------------------------------------------------|-------------------------------------|--------|---------------------|--------|------------|----------------|
|                                                                                                                                                                                                                                                                                                                                                                                                                                                                                                                                                                                                                                                                                                                                                      | <b>Absolute Difference (SE)</b>     |        |                     |        |            |                |
| <b>Physical measurements</b>                                                                                                                                                                                                                                                                                                                                                                                                                                                                                                                                                                                                                                                                                                                         |                                     |        |                     |        |            |                |
| Weight (kg)*                                                                                                                                                                                                                                                                                                                                                                                                                                                                                                                                                                                                                                                                                                                                         | 82.3                                | (0.1)  | 83.2                | (0.1)  | -0.9       | (0.1)          |
| Systolic blood pressure<br>(mmHg)*                                                                                                                                                                                                                                                                                                                                                                                                                                                                                                                                                                                                                                                                                                                   | 132.8                               | (0.2)  | 135.3               | (0.2)  | -2.6       | (0.3)          |
| Diastolic blood pressure<br>(mmHg)*                                                                                                                                                                                                                                                                                                                                                                                                                                                                                                                                                                                                                                                                                                                  | 76.3                                | (0.1)  | 76.8                | (0.1)  | -0.5       | (0.2)          |
| <b>Laboratory measurements</b>                                                                                                                                                                                                                                                                                                                                                                                                                                                                                                                                                                                                                                                                                                                       |                                     |        |                     |        |            |                |
|                                                                                                                                                                                                                                                                                                                                                                                                                                                                                                                                                                                                                                                                                                                                                      | <b>Absolute Difference (95% CI)</b> |        |                     |        |            |                |
| <b>HbA1c (mmol/mol)*</b>                                                                                                                                                                                                                                                                                                                                                                                                                                                                                                                                                                                                                                                                                                                             |                                     |        |                     |        |            |                |
| Prior diabetes                                                                                                                                                                                                                                                                                                                                                                                                                                                                                                                                                                                                                                                                                                                                       | 53.44                               | (0.28) | 54.30               | (0.28) | -0.86      | (-1.63, 0.09)  |
| No prior diabetes                                                                                                                                                                                                                                                                                                                                                                                                                                                                                                                                                                                                                                                                                                                                    | 36.88                               | (0.07) | 36.91               | (0.07) | -0.03      | (-0.22, 0.17)  |
| All                                                                                                                                                                                                                                                                                                                                                                                                                                                                                                                                                                                                                                                                                                                                                  | 44.52                               | (0.14) | 44.90               | (0.14) | -0.39      | (-0.77, -0.01) |
| Potassium (mmol/L)*                                                                                                                                                                                                                                                                                                                                                                                                                                                                                                                                                                                                                                                                                                                                  | 4.52                                | (0.01) | 4.55                | (0.01) | -0.04      | (-0.05, -0.02) |
|                                                                                                                                                                                                                                                                                                                                                                                                                                                                                                                                                                                                                                                                                                                                                      | <b>Relative Difference (SE)</b>     |        |                     |        |            |                |
| <b>Liver function tests</b>                                                                                                                                                                                                                                                                                                                                                                                                                                                                                                                                                                                                                                                                                                                          |                                     |        |                     |        |            |                |
| ALT or AST ≥5x ULN‡                                                                                                                                                                                                                                                                                                                                                                                                                                                                                                                                                                                                                                                                                                                                  | 13                                  | (0.4%) | 12                  | (0.4%) | 0.03%      | (0.15%)        |
| ALT or AST ≥3x ULN<br>and bilirubin ≥2x ULN‡                                                                                                                                                                                                                                                                                                                                                                                                                                                                                                                                                                                                                                                                                                         | 2                                   | (0.1%) | 4                   | (0.1%) | -0.06%     | (0.07%)        |
|                                                                                                                                                                                                                                                                                                                                                                                                                                                                                                                                                                                                                                                                                                                                                      | <b>Relative Difference (95% CI)</b> |        |                     |        |            |                |
| Urinary albumin-to-<br>creatinine ratio (mg/g)†                                                                                                                                                                                                                                                                                                                                                                                                                                                                                                                                                                                                                                                                                                      | 202                                 | (4)    | 250                 | (5)    | -19%       | (-23%, -15%)   |
| All analyses (with the exception of liver function tests) use a linear mixed model repeated measures (MMRM) approach including fixed, categorical effects of treatment allocation, time point, treatment-by-time point interaction, and the prognostic variables used in the minimization algorithm (in the same categories used in the minimization process) along with continuous effects of baseline (randomization) measurement and baseline-by-time point interaction. Mean follow-up values averaged over all time points at which measurements were scheduled are presented (see protocol and DAP for further details). For analyses of HbA1c by diabetes status, models were fitted separately among participants with and without diabetes. |                                     |        |                     |        |            |                |
| * Mean (standard error [SE]).                                                                                                                                                                                                                                                                                                                                                                                                                                                                                                                                                                                                                                                                                                                        |                                     |        |                     |        |            |                |
| † Geometric mean (SE).                                                                                                                                                                                                                                                                                                                                                                                                                                                                                                                                                                                                                                                                                                                               |                                     |        |                     |        |            |                |
| ‡ Number of participants (%).                                                                                                                                                                                                                                                                                                                                                                                                                                                                                                                                                                                                                                                                                                                        |                                     |        |                     |        |            |                |
| Abbreviations: HbA1c = glycated hemoglobin; ALT = alanine aminotransferase; AST = aspartate aminotransferase; ULN = upper limit of normal.                                                                                                                                                                                                                                                                                                                                                                                                                                                                                                                                                                                                           |                                     |        |                     |        |            |                |



Table S9b. Liver Function Test Assessments, by Time

|                                                                                                                                                          | Empagliflozin<br>(N=3037) |        | Placebo<br>(N=3054) |        |
|----------------------------------------------------------------------------------------------------------------------------------------------------------|---------------------------|--------|---------------------|--------|
| <b>Laboratory measurements</b>                                                                                                                           |                           |        |                     |        |
| ALT or AST $\geq$ 5x ULN                                                                                                                                 |                           |        |                     |        |
| 2 months                                                                                                                                                 | 3                         | (0.1%) | 2                   | (0.1%) |
| 6 months                                                                                                                                                 | 1                         | (0.0%) | 1                   | (0.0%) |
| 12 months                                                                                                                                                | 4                         | (0.1%) | 1                   | (0.0%) |
| 18 months                                                                                                                                                | 2                         | (0.1%) | 4                   | (0.1%) |
| 24 months                                                                                                                                                | 3                         | (0.2%) | 2                   | (0.1%) |
| 30 months                                                                                                                                                | 0                         | (0.0%) | 3                   | (0.2%) |
| 36 months                                                                                                                                                | 0                         | (0.0%) | 0                   | (0.0%) |
| ALT or AST $\geq$ 3x ULN and bilirubin $\geq$ 2x ULN                                                                                                     |                           |        |                     |        |
| 2 months                                                                                                                                                 | 0                         | (0.0%) | 0                   | (0.0%) |
| 6 months                                                                                                                                                 | 0                         | (0.0%) | 0                   | (0.0%) |
| 12 months                                                                                                                                                | 2                         | (0.1%) | 1                   | (0.0%) |
| 18 months                                                                                                                                                | 0                         | (0.0%) | 1                   | (0.0%) |
| 24 months                                                                                                                                                | 0                         | (0.0%) | 0                   | (0.0%) |
| 30 months                                                                                                                                                | 0                         | (0.0%) | 2                   | (0.2%) |
| 36 months                                                                                                                                                | 0                         | (0.0%) | 0                   | (0.0%) |
| Figures are number of participants (%).<br>Abbreviations: ALT = alanine aminotransferase; AST = aspartate aminotransferase; ULN = upper limit of normal. |                           |        |                     |        |

Table S10. Local Laboratory Blood Assessments at 18 Months, in a Subset from the United Kingdom

|                            | Empagliflozin<br>(N=442) |        | Placebo<br>(N=395) |        | Difference (SE) |        |
|----------------------------|--------------------------|--------|--------------------|--------|-----------------|--------|
| Sodium (mmol/L)            | 139.3                    | (0.1)  | 138.8              | (0.1)  | 0.5             | (0.2)  |
| Corrected calcium (mmol/L) | 2.36                     | (0.01) | 2.35               | (0.01) | 0.01            | (0.01) |
| Phosphate (mmol/L)         | 1.17                     | (0.01) | 1.13               | (0.01) | 0.04            | (0.02) |
| Hematocrit (%)             | 40.4                     | (0.2)  | 38.2               | (0.2)  | 2.2             | (0.3)  |
| Hemoglobin (g/L)           | 135.3                    | (0.6)  | 127.8              | (0.6)  | 7.5             | (0.8)  |

Figures are mean (SE). For sodium, corrected calcium, and phosphate, mean follow-up values and their differences are presented. For haematocrit and haemoglobin, baseline-adjusted mean follow-up values (estimated using ANCOVA adjusted for each patient's value at randomization) and their differences are presented.
